# Supplementary material for: Systematic analysis of histone acetylation regulators across human cancers
Source: BMC Cancer. 2023 Aug 8;23:733. doi: 10.1186/s12885-023-11220-7 (PMC10408135; doi:10.1186/s12885-023-11220-7)
Supplement: Supplementary file 5 — Supplementary Material 5 [file 12885_2023_11220_MOESM5_ESM.xls]

## Sheet: Sheet1
Table S2.A summary of the HA regulators identified and their genetic alterations across different cancer types
CNV-amp				CNV-del				Mutation
cancer	gene	percent		cancer	gene	percent		Hugo_Symbol	type	all_mut_sample	non_silent_mut_sample	all_sample_count	frequency
GBM	BRD3	0.0125		GBM	HDAC7	0.00833333		ATAD2B	ACC	2	1	92	0.0108696
OV	BRD3	0.0117188		OV	HDAC7	NA		ATAD2B	BLCA	8	6	411	0.0145985
LUAD	BRD3	0.00604839		LUAD	HDAC7	0.00201613		ATAD2B	BRCA	23	22	1026	0.0214425
LUSC	BRD3	0.0193548		LUSC	HDAC7	NA		ATAD2B	CESC	6	5	291	0.0171821
PRAD	BRD3	0.026694		PRAD	HDAC7	0.00410678		ATAD2B	CHOL	1	1	36	0.0277778
UCEC	BRD3	0.00607287		UCEC	HDAC7	0.00202429		ATAD2B	COAD	21	19	408	0.0465686
BLCA	BRD3	0.00246305		BLCA	HDAC7	NA		ATAD2B	ESCA	2	2	185	0.0108108
TGCT	BRD3	NA		TGCT	HDAC7	NA		ATAD2B	GBM	2	2	403	0.00496278
ESCA	BRD3	0.0245399		ESCA	HDAC7	0.00613497		ATAD2B	HNSC	11	9	509	0.0176817
PAAD	BRD3	0.0171429		PAAD	HDAC7	0.00571429		ATAD2B	KIRC	3	3	370	0.00810811
KIRP	BRD3	0.00743494		KIRP	HDAC7	NA		ATAD2B	KIRP	6	6	282	0.0212766
LIHC	BRD3	0.019337		LIHC	HDAC7	0.00276243		ATAD2B	LIHC	8	7	365	0.0191781
CESC	BRD3	0.0101351		CESC	HDAC7	NA		ATAD2B	LUAD	7	6	569	0.0105448
SARC	BRD3	0.024		SARC	HDAC7	NA		ATAD2B	LUSC	11	10	485	0.0206186
BRCA	BRD3	0.0095511		BRCA	HDAC7	0.00095511		ATAD2B	OV	3	2	412	0.00485437
THYM	BRD3	NA		THYM	HDAC7	NA		ATAD2B	PAAD	3	3	178	0.0168539
MESO	BRD3	0.0120482		MESO	HDAC7	NA		ATAD2B	PRAD	1	1	498	0.00200803
COAD	BRD3	0.00253165		COAD	HDAC7	NA		ATAD2B	READ	7	7	151	0.0463576
STAD	BRD3	0.0189573		STAD	HDAC7	0.00236967		ATAD2B	SARC	3	3	239	0.0125523
SKCM	BRD3	0.00431965		SKCM	HDAC7	0.00431965		ATAD2B	SKCM	32	30	468	0.0641026
CHOL	BRD3	NA		KIRC	HDAC7	0.00302115		ATAD2B	STAD	11	8	439	0.0182232
KIRC	BRD3	NA		THCA	HDAC7	NA		ATAD2B	TGCT	1	1	151	0.00662252
THCA	BRD3	0.0021097		HNSC	HDAC7	0.002		ATAD2B	UCEC	63	59	531	0.111111
HNSC	BRD3	0.024		LAML	HDAC7	0.00847458		ATAD2B	UCS	1	1	57	0.0175439
LAML	BRD3	NA		READ	HDAC7	NA		ATAD2B	UVM	1	1	80	0.0125
READ	BRD3	0.00724638		LGG	HDAC7	0.015625		BAZ2B	ACC	2	2	92	0.0217391
LGG	BRD3	0.015625		DLBC	HDAC7	0.0212766		BAZ2B	BLCA	27	25	411	0.0608273
DLBC	BRD3	NA		KICH	HDAC7	NA		BAZ2B	BRCA	23	21	1026	0.0204678
KICH	BRD3	NA		UCS	HDAC7	NA		BAZ2B	CESC	10	9	291	0.0309278
UCS	BRD3	NA		ACC	HDAC7	NA		BAZ2B	COAD	23	19	408	0.0465686
ACC	BRD3	0.0519481		PCPG	HDAC7	0.00609756		BAZ2B	DLBC	1	1	37	0.027027
PCPG	BRD3	0.0182927		UVM	HDAC7	0.0125		BAZ2B	ESCA	10	10	185	0.0540541
UVM	BRD3	NA		GBM	KAT7	0.00416667		BAZ2B	GBM	8	7	403	0.0173697
GBM	YEATS4	0.0291667		OV	KAT7	NA		BAZ2B	HNSC	20	17	509	0.0333988
OV	YEATS4	0.0664062		LUAD	KAT7	NA		BAZ2B	KIRC	8	8	370	0.0216216
LUAD	YEATS4	0.0483871		LUSC	KAT7	NA		BAZ2B	KIRP	5	4	282	0.0141844
LUSC	YEATS4	0.0258065		PRAD	KAT7	0.00410678		BAZ2B	LAML	4	4	140	0.0285714
PRAD	YEATS4	0.026694		UCEC	KAT7	0.00202429		BAZ2B	LGG	2	2	526	0.00380228
UCEC	YEATS4	0.00607287		BLCA	KAT7	NA		BAZ2B	LIHC	12	10	365	0.0273973
BLCA	YEATS4	0.0837438		TGCT	KAT7	NA		BAZ2B	LUAD	28	25	569	0.0439367
TGCT	YEATS4	0.0451613		ESCA	KAT7	NA		BAZ2B	LUSC	33	28	485	0.057732
ESCA	YEATS4	0.0674847		PAAD	KAT7	NA		BAZ2B	MESO	2	2	82	0.0243902
PAAD	YEATS4	0.0514286		KIRP	KAT7	NA		BAZ2B	OV	9	7	412	0.0169903
KIRP	YEATS4	0.00371747		LIHC	KAT7	NA		BAZ2B	PAAD	1	1	178	0.00561798
LIHC	YEATS4	0.019337		CESC	KAT7	NA		BAZ2B	PRAD	6	4	498	0.00803213
CESC	YEATS4	0.00675676		SARC	KAT7	NA		BAZ2B	READ	3	3	151	0.0198675
SARC	YEATS4	0.156		BRCA	KAT7	0.00191022		BAZ2B	SARC	5	4	239	0.0167364
BRCA	YEATS4	0.0439351		THYM	KAT7	NA		BAZ2B	SKCM	45	38	468	0.0811966
THYM	YEATS4	NA		MESO	KAT7	NA		BAZ2B	STAD	26	21	439	0.047836
MESO	YEATS4	0.0120482		COAD	KAT7	NA		BAZ2B	UCEC	77	75	531	0.141243
COAD	YEATS4	0.00253165		STAD	KAT7	NA		BAZ2B	UCS	1	1	57	0.0175439
STAD	YEATS4	0.0521327		SKCM	KAT7	NA		BPTF	BLCA	35	29	411	0.0705596
SKCM	YEATS4	0.0367171		KIRC	KAT7	NA		BPTF	BRCA	23	18	1026	0.0175439
CHOL	YEATS4	NA		THCA	KAT7	NA		BPTF	CESC	17	16	291	0.0549828
KIRC	YEATS4	0.0060423		HNSC	KAT7	NA		BPTF	COAD	26	22	408	0.0539216
THCA	YEATS4	NA		LAML	KAT7	NA		BPTF	DLBC	1	1	37	0.027027
HNSC	YEATS4	0.036		READ	KAT7	NA		BPTF	ESCA	5	5	185	0.027027
LAML	YEATS4	NA		LGG	KAT7	NA		BPTF	GBM	9	7	403	0.0173697
READ	YEATS4	0.00724638		DLBC	KAT7	NA		BPTF	HNSC	10	10	509	0.0196464
LGG	YEATS4	0.0078125		KICH	KAT7	NA		BPTF	KICH	2	1	66	0.0151515
DLBC	YEATS4	0.0425532		UCS	KAT7	NA		BPTF	KIRC	4	4	370	0.0108108
KICH	YEATS4	NA		ACC	KAT7	NA		BPTF	KIRP	6	5	282	0.0177305
UCS	YEATS4	0.0892857		PCPG	KAT7	NA		BPTF	LGG	4	2	526	0.00380228
ACC	YEATS4	0.0909091		UVM	KAT7	0.0125		BPTF	LIHC	12	10	365	0.0273973
PCPG	YEATS4	0.0243902		GBM	KAT2A	0.00416667		BPTF	LUAD	33	29	569	0.0509666
UVM	YEATS4	NA		OV	KAT2A	0.0117188		BPTF	LUSC	21	20	485	0.0412371
GBM	HDAC9	0.0208333		LUAD	KAT2A	NA		BPTF	OV	7	7	412	0.0169903
OV	HDAC9	0.0390625		LUSC	KAT2A	0.00430108		BPTF	PAAD	5	5	178	0.0280899
LUAD	HDAC9	0.0584677		PRAD	KAT2A	0.0287474		BPTF	PCPG	1	1	184	0.00543478
LUSC	HDAC9	0.0387097		UCEC	KAT2A	0.00404858		BPTF	PRAD	5	3	498	0.0060241
PRAD	HDAC9	0.0308008		BLCA	KAT2A	NA		BPTF	READ	6	5	151	0.0331126
UCEC	HDAC9	0.0202429		TGCT	KAT2A	NA		BPTF	SARC	2	1	239	0.0041841
BLCA	HDAC9	0.0492611		ESCA	KAT2A	NA		BPTF	SKCM	59	49	468	0.104701
TGCT	HDAC9	0.0193548		PAAD	KAT2A	NA		BPTF	STAD	33	27	439	0.0615034
ESCA	HDAC9	0.0368098		KIRP	KAT2A	NA		BPTF	TGCT	1	1	151	0.00662252
PAAD	HDAC9	0.0285714		LIHC	KAT2A	0.00276243		BPTF	THCA	5	5	500	0.01
KIRP	HDAC9	0.00371747		CESC	KAT2A	0.00675676		BPTF	UCEC	68	62	531	0.116761
LIHC	HDAC9	0.0220994		SARC	KAT2A	NA		BRD2	BLCA	25	20	411	0.0486618
CESC	HDAC9	0.00337838		BRCA	KAT2A	0.00764088		BRD2	BRCA	6	6	1026	0.00584795
SARC	HDAC9	0.048		THYM	KAT2A	NA		BRD2	CESC	8	7	291	0.024055
BRCA	HDAC9	0.0200573		MESO	KAT2A	NA		BRD2	CHOL	2	2	36	0.0555556
THYM	HDAC9	NA		COAD	KAT2A	0.00253165		BRD2	COAD	16	12	408	0.0294118
MESO	HDAC9	NA		STAD	KAT2A	NA		BRD2	DLBC	2	2	37	0.0540541
COAD	HDAC9	0.0101266		SKCM	KAT2A	NA		BRD2	ESCA	5	5	185	0.027027
STAD	HDAC9	0.0379147		KIRC	KAT2A	NA		BRD2	GBM	7	5	403	0.0124069
SKCM	HDAC9	0.0388769		THCA	KAT2A	NA		BRD2	HNSC	2	1	509	0.00196464
CHOL	HDAC9	0.0277778		HNSC	KAT2A	NA		BRD2	KIRC	3	2	370	0.00540541
KIRC	HDAC9	0.00906344		LAML	KAT2A	0.00847458		BRD2	KIRP	8	6	282	0.0212766
THCA	HDAC9	NA		READ	KAT2A	NA		BRD2	LGG	4	4	526	0.00760456
HNSC	HDAC9	0.024		LGG	KAT2A	0.00195312		BRD2	LIHC	2	2	365	0.00547945
LAML	HDAC9	NA		DLBC	KAT2A	NA		BRD2	LUAD	9	8	569	0.0140598
READ	HDAC9	0.0217391		KICH	KAT2A	NA		BRD2	LUSC	14	8	485	0.0164948
LGG	HDAC9	0.0078125		UCS	KAT2A	NA		BRD2	OV	6	6	412	0.0145631
DLBC	HDAC9	NA		ACC	KAT2A	0.025974		BRD2	PAAD	2	1	178	0.00561798
KICH	HDAC9	0.0163934		PCPG	KAT2A	NA		BRD2	PRAD	1	1	498	0.00200803
UCS	HDAC9	NA		UVM	KAT2A	0.025		BRD2	READ	2	2	151	0.013245
ACC	HDAC9	0.025974		GBM	HDAC5	0.00416667		BRD2	SARC	5	5	239	0.0209205
PCPG	HDAC9	0.0182927		OV	HDAC5	0.0117188		BRD2	SKCM	33	26	468	0.0555556
UVM	HDAC9	NA		LUAD	HDAC5	NA		BRD2	STAD	21	15	439	0.0341686
GBM	HDAC7	0.00416667		LUSC	HDAC5	0.00430108		BRD2	THYM	1	1	123	0.00813008
OV	HDAC7	0.0351562		PRAD	HDAC5	0.0677618		BRD2	UCEC	37	32	531	0.0602637
LUAD	HDAC7	0.00604839		UCEC	HDAC5	0.00202429		BRD3	ACC	2	2	92	0.0217391
LUSC	HDAC7	0.00430108		BLCA	HDAC5	NA		BRD3	BLCA	5	1	411	0.00243309
PRAD	HDAC7	0.00205339		TGCT	HDAC5	NA		BRD3	BRCA	7	6	1026	0.00584795
UCEC	HDAC7	0.0283401		ESCA	HDAC5	0.00613497		BRD3	CESC	7	6	291	0.0206186
BLCA	HDAC7	0.0147783		PAAD	HDAC5	NA		BRD3	COAD	23	18	408	0.0441176
TGCT	HDAC7	0.00645161		KIRP	HDAC5	NA		BRD3	DLBC	1	1	37	0.027027
ESCA	HDAC7	0.0122699		LIHC	HDAC5	0.00276243		BRD3	ESCA	4	4	185	0.0216216
PAAD	HDAC7	0.0171429		CESC	HDAC5	0.00675676		BRD3	GBM	3	3	403	0.00744417
KIRP	HDAC7	NA		SARC	HDAC5	NA		BRD3	HNSC	4	2	509	0.00392927
LIHC	HDAC7	NA		BRCA	HDAC5	0.00764088		BRD3	KIRC	1	1	370	0.0027027
CESC	HDAC7	0.0101351		THYM	HDAC5	NA		BRD3	KIRP	3	3	282	0.0106383
SARC	HDAC7	0.04		MESO	HDAC5	NA		BRD3	LGG	4	4	526	0.00760456
BRCA	HDAC7	0.00573066		COAD	HDAC5	0.00253165		BRD3	LIHC	1	1	365	0.00273973
THYM	HDAC7	NA		STAD	HDAC5	0.007109		BRD3	LUAD	7	5	569	0.00878735
MESO	HDAC7	NA		SKCM	HDAC5	NA		BRD3	LUSC	4	3	485	0.00618557
COAD	HDAC7	0.00253165		KIRC	HDAC5	NA		BRD3	OV	2	2	412	0.00485437
STAD	HDAC7	0.007109		THCA	HDAC5	NA		BRD3	PAAD	1	1	178	0.00561798
SKCM	HDAC7	0.0107991		HNSC	HDAC5	NA		BRD3	PRAD	1	1	498	0.00200803
CHOL	HDAC7	NA		LAML	HDAC5	NA		BRD3	READ	4	4	151	0.0264901
KIRC	HDAC7	0.00302115		READ	HDAC5	NA		BRD3	SARC	6	5	239	0.0209205
THCA	HDAC7	NA		LGG	HDAC5	0.00195312		BRD3	SKCM	22	14	468	0.0299145
HNSC	HDAC7	0.006		DLBC	HDAC5	NA		BRD3	STAD	25	18	439	0.0410023
LAML	HDAC7	NA		KICH	HDAC5	NA		BRD3	THCA	3	2	500	0.004
READ	HDAC7	NA		UCS	HDAC5	NA		BRD3	UCEC	65	57	531	0.107345
LGG	HDAC7	0.00390625		ACC	HDAC5	0.025974		BRD3	UCS	1	1	57	0.0175439
DLBC	HDAC7	0.0425532		PCPG	HDAC5	NA		BRD4	BLCA	18	14	411	0.0340633
KICH	HDAC7	NA		UVM	HDAC5	0.025		BRD4	BRCA	9	8	1026	0.00779727
UCS	HDAC7	0.0714286		GBM	HDAC2	0.00416667		BRD4	CESC	10	9	291	0.0309278
ACC	HDAC7	0.038961		OV	HDAC2	0.0078125		BRD4	COAD	25	21	408	0.0514706
PCPG	HDAC7	0.0121951		LUAD	HDAC2	0.0322581		BRD4	DLBC	1	1	37	0.027027
UVM	HDAC7	NA		LUSC	HDAC2	NA		BRD4	ESCA	8	8	185	0.0432432
GBM	SIRT2	0.0125		PRAD	HDAC2	0.112936		BRD4	GBM	8	8	403	0.0198511
OV	SIRT2	0.140625		UCEC	HDAC2	0.00202429		BRD4	HNSC	11	8	509	0.0157171
LUAD	SIRT2	0.0362903		BLCA	HDAC2	0.0123153		BRD4	KIRC	1	1	370	0.0027027
LUSC	SIRT2	0.0860215		TGCT	HDAC2	0.0129032		BRD4	KIRP	7	3	282	0.0106383
PRAD	SIRT2	0.00821355		ESCA	HDAC2	0.0122699		BRD4	LAML	1	1	140	0.00714286
UCEC	SIRT2	0.048583		PAAD	HDAC2	0.00571429		BRD4	LGG	2	1	526	0.00190114
BLCA	SIRT2	0.0591133		KIRP	HDAC2	NA		BRD4	LIHC	7	7	365	0.0191781
TGCT	SIRT2	NA		LIHC	HDAC2	0.0276243		BRD4	LUAD	14	10	569	0.0175747
ESCA	SIRT2	0.0306748		CESC	HDAC2	0.0101351		BRD4	LUSC	19	15	485	0.0309278
PAAD	SIRT2	0.0857143		SARC	HDAC2	NA		BRD4	OV	7	5	412	0.0121359
KIRP	SIRT2	0.00371747		BRCA	HDAC2	0.0124164		BRD4	PAAD	3	3	178	0.0168539
LIHC	SIRT2	0.0110497		THYM	HDAC2	0.00813008		BRD4	PRAD	1	1	498	0.00200803
CESC	SIRT2	0.0472973		MESO	HDAC2	0.0240964		BRD4	READ	4	3	151	0.0198675
SARC	SIRT2	0.064		COAD	HDAC2	0.0101266		BRD4	SARC	4	4	239	0.0167364
BRCA	SIRT2	0.0229226		STAD	HDAC2	0.014218		BRD4	SKCM	46	36	468	0.0769231
THYM	SIRT2	NA		SKCM	HDAC2	0.0302376		BRD4	STAD	27	21	439	0.047836
MESO	SIRT2	0.0361446		KIRC	HDAC2	0.0151057		BRD4	THCA	2	2	500	0.004
COAD	SIRT2	0.0151899		THCA	HDAC2	0.0021097		BRD4	THYM	2	2	123	0.0162602
STAD	SIRT2	0.0236967		HNSC	HDAC2	0.008		BRD4	UCEC	54	46	531	0.086629
SKCM	SIRT2	0.0151188		LAML	HDAC2	NA		BRDT	ACC	1	1	92	0.0108696
CHOL	SIRT2	0.0277778		READ	HDAC2	NA		BRDT	BLCA	11	10	411	0.0243309
KIRC	SIRT2	NA		LGG	HDAC2	0.0195312		BRDT	BRCA	8	7	1026	0.00682261
THCA	SIRT2	NA		DLBC	HDAC2	0.106383		BRDT	CESC	4	4	291	0.0137457
HNSC	SIRT2	0.018		KICH	HDAC2	NA		BRDT	CHOL	1	1	36	0.0277778
LAML	SIRT2	NA		UCS	HDAC2	NA		BRDT	COAD	11	9	408	0.0220588
READ	SIRT2	NA		ACC	HDAC2	NA		BRDT	ESCA	1	1	185	0.00540541
LGG	SIRT2	0.00976562		PCPG	HDAC2	NA		BRDT	GBM	4	3	403	0.00744417
DLBC	SIRT2	NA		UVM	HDAC2	0.0625		BRDT	HNSC	9	7	509	0.0137525
KICH	SIRT2	NA		GBM	KAT6B	0.00833333		BRDT	KIRC	4	2	370	0.00540541
UCS	SIRT2	0.196429		OV	KAT6B	0.00390625		BRDT	KIRP	1	1	282	0.0035461
ACC	SIRT2	NA		LUAD	KAT6B	0.00403226		BRDT	LGG	1	1	526	0.00190114
PCPG	SIRT2	0.00609756		LUSC	KAT6B	0.00645161		BRDT	LIHC	5	3	365	0.00821918
UVM	SIRT2	NA		PRAD	KAT6B	0.0246407		BRDT	LUAD	25	21	569	0.0369069
GBM	CREBBP	0.00833333		UCEC	KAT6B	0.00404858		BRDT	LUSC	17	14	485	0.028866
OV	CREBBP	0.0195312		BLCA	KAT6B	0.00738916		BRDT	OV	4	4	412	0.00970874
LUAD	CREBBP	0.0100806		TGCT	KAT6B	NA		BRDT	PAAD	1	1	178	0.00561798
LUSC	CREBBP	0.00645161		ESCA	KAT6B	NA		BRDT	READ	7	5	151	0.0331126
PRAD	CREBBP	0.0184805		PAAD	KAT6B	NA		BRDT	SARC	3	2	239	0.0083682
UCEC	CREBBP	0.0101215		KIRP	KAT6B	0.00371747		BRDT	SKCM	40	34	468	0.0726496
BLCA	CREBBP	NA		LIHC	KAT6B	0.0110497		BRDT	STAD	15	10	439	0.022779
TGCT	CREBBP	NA		CESC	KAT6B	0.00337838		BRDT	THCA	2	2	500	0.004
ESCA	CREBBP	NA		SARC	KAT6B	0.02		BRDT	UCEC	48	45	531	0.0847458
PAAD	CREBBP	0.0114286		BRCA	KAT6B	0.00191022		BRDT	UCS	1	1	57	0.0175439
KIRP	CREBBP	0.00743494		THYM	KAT6B	0.00813008		CREBBP	ACC	1	1	92	0.0108696
LIHC	CREBBP	0.0138122		MESO	KAT6B	NA		CREBBP	BLCA	55	51	411	0.124088
CESC	CREBBP	0.0236486		COAD	KAT6B	0.00506329		CREBBP	BRCA	26	23	1026	0.0224172
SARC	CREBBP	0.036		STAD	KAT6B	0.0118483		CREBBP	CESC	31	27	291	0.0927835
BRCA	CREBBP	0.0706781		SKCM	KAT6B	0.00215983		CREBBP	COAD	49	40	408	0.0980392
THYM	CREBBP	NA		KIRC	KAT6B	NA		CREBBP	DLBC	5	5	37	0.135135
MESO	CREBBP	0.0120482		THCA	KAT6B	0.0105485		CREBBP	ESCA	12	10	185	0.0540541
COAD	CREBBP	0.00253165		HNSC	KAT6B	0.002		CREBBP	GBM	9	7	403	0.0173697
STAD	CREBBP	0.0118483		LAML	KAT6B	NA		CREBBP	HNSC	35	30	509	0.0589391
SKCM	CREBBP	0.00863931		READ	KAT6B	0.00724638		CREBBP	KIRC	4	4	370	0.0108108
CHOL	CREBBP	0.0277778		LGG	KAT6B	0.00195312		CREBBP	KIRP	10	8	282	0.0283688
KIRC	CREBBP	0.0060423		DLBC	KAT6B	0.0212766		CREBBP	LAML	4	4	140	0.0285714
THCA	CREBBP	0.0021097		KICH	KAT6B	NA		CREBBP	LGG	7	7	526	0.013308
HNSC	CREBBP	0.006		UCS	KAT6B	NA		CREBBP	LIHC	8	6	365	0.0164384
LAML	CREBBP	NA		ACC	KAT6B	NA		CREBBP	LUAD	31	26	569	0.0456942
READ	CREBBP	NA		PCPG	KAT6B	NA		CREBBP	LUSC	41	35	485	0.0721649
LGG	CREBBP	0.00585938		UVM	KAT6B	NA		CREBBP	MESO	2	1	82	0.0121951
DLBC	CREBBP	0.0212766		GBM	SMARCA2	0.0291667		CREBBP	OV	16	15	412	0.0364078
KICH	CREBBP	NA		OV	SMARCA2	0.0234375		CREBBP	PAAD	3	2	178	0.011236
UCS	CREBBP	NA		LUAD	SMARCA2	0.0544355		CREBBP	PRAD	7	5	498	0.0100402
ACC	CREBBP	0.012987		LUSC	SMARCA2	0.0451613		CREBBP	READ	10	8	151	0.0529801
PCPG	CREBBP	NA		PRAD	SMARCA2	0.0246407		CREBBP	SARC	3	3	239	0.0125523
UVM	CREBBP	0.0125		UCEC	SMARCA2	0.00809717		CREBBP	SKCM	70	55	468	0.117521
GBM	BPTF	0.00416667		BLCA	SMARCA2	0.0320197		CREBBP	STAD	50	41	439	0.0933941
OV	BPTF	0.0820312		TGCT	SMARCA2	0.0258065		CREBBP	TGCT	2	2	151	0.013245
LUAD	BPTF	0.0544355		ESCA	SMARCA2	0.0552147		CREBBP	THCA	2	1	500	0.002
LUSC	BPTF	0.0494624		PAAD	SMARCA2	0.0171429		CREBBP	UCEC	83	72	531	0.135593
PRAD	BPTF	0.0205339		KIRP	SMARCA2	0.0111524		CREBBP	UCS	3	3	57	0.0526316
UCEC	BPTF	0.0283401		LIHC	SMARCA2	0.0110497		DPF1	BLCA	5	2	411	0.00486618
BLCA	BPTF	0.044335		CESC	SMARCA2	0.0101351		DPF1	BRCA	1	1	1026	0.000974659
TGCT	BPTF	NA		SARC	SMARCA2	0.028		DPF1	CESC	3	3	291	0.0103093
ESCA	BPTF	0.0429448		BRCA	SMARCA2	0.0105062		DPF1	COAD	6	6	408	0.0147059
PAAD	BPTF	0.0285714		THYM	SMARCA2	NA		DPF1	ESCA	1	1	185	0.00540541
KIRP	BPTF	0.0446097		MESO	SMARCA2	NA		DPF1	GBM	1	1	403	0.00248139
LIHC	BPTF	0.0524862		COAD	SMARCA2	0.00253165		DPF1	HNSC	3	3	509	0.00589391
CESC	BPTF	0.0202703		STAD	SMARCA2	0.063981		DPF1	LGG	1	1	526	0.00190114
SARC	BPTF	0.052		SKCM	SMARCA2	0.0215983		DPF1	LIHC	3	2	365	0.00547945
BRCA	BPTF	0.0964661		KIRC	SMARCA2	NA		DPF1	LUAD	8	7	569	0.0123023
THYM	BPTF	0.0162602		THCA	SMARCA2	NA		DPF1	LUSC	3	3	485	0.00618557
MESO	BPTF	0.0722892		HNSC	SMARCA2	0.018		DPF1	MESO	1	1	82	0.0121951
COAD	BPTF	0.0151899		LAML	SMARCA2	NA		DPF1	OV	3	2	412	0.00485437
STAD	BPTF	0.0189573		READ	SMARCA2	0.0144928		DPF1	PAAD	1	1	178	0.00561798
SKCM	BPTF	0.0475162		LGG	SMARCA2	0.0546875		DPF1	PRAD	1	1	498	0.00200803
CHOL	BPTF	0.0555556		DLBC	SMARCA2	NA		DPF1	READ	2	2	151	0.013245
KIRC	BPTF	0.0120846		KICH	SMARCA2	NA		DPF1	SKCM	11	8	468	0.017094
THCA	BPTF	0.00632911		UCS	SMARCA2	0.0357143		DPF1	STAD	9	9	439	0.0205011
HNSC	BPTF	0.012		ACC	SMARCA2	NA		DPF1	THYM	1	1	123	0.00813008
LAML	BPTF	0.00847458		PCPG	SMARCA2	0.00609756		DPF1	UCEC	18	16	531	0.0301318
READ	BPTF	0.0144928		UVM	SMARCA2	NA		DPF1	UCS	1	1	57	0.0175439
LGG	BPTF	0.0351562		GBM	HDAC10	0.0125		DPF2	BLCA	8	8	411	0.0194647
DLBC	BPTF	NA		OV	HDAC10	0.0976562		DPF2	BRCA	6	3	1026	0.00292398
KICH	BPTF	NA		LUAD	HDAC10	0.0483871		DPF2	CESC	1	1	291	0.00343643
UCS	BPTF	0.0535714		LUSC	HDAC10	0.0150538		DPF2	COAD	10	7	408	0.0171569
ACC	BPTF	0.012987		PRAD	HDAC10	0.0184805		DPF2	ESCA	1	1	185	0.00540541
PCPG	BPTF	0.0182927		UCEC	HDAC10	0.0465587		DPF2	GBM	2	1	403	0.00248139
UVM	BPTF	0.0375		BLCA	HDAC10	0.0492611		DPF2	HNSC	5	4	509	0.00785855
GBM	SMARCA2	0.00416667		TGCT	HDAC10	0.0129032		DPF2	KIRP	5	4	282	0.0141844
OV	SMARCA2	0.09375		ESCA	HDAC10	0.00613497		DPF2	LGG	2	2	526	0.00380228
LUAD	SMARCA2	0.00403226		PAAD	HDAC10	0.0285714		DPF2	LIHC	2	2	365	0.00547945
LUSC	SMARCA2	0.0215054		KIRP	HDAC10	0.0260223		DPF2	LUAD	10	8	569	0.0140598
PRAD	SMARCA2	NA		LIHC	HDAC10	0.019337		DPF2	LUSC	6	3	485	0.00618557
UCEC	SMARCA2	0.0283401		CESC	HDAC10	0.0405405		DPF2	OV	2	2	412	0.00485437
BLCA	SMARCA2	0.0221675		SARC	HDAC10	0.024		DPF2	PAAD	1	1	178	0.00561798
TGCT	SMARCA2	NA		BRCA	HDAC10	0.0162369		DPF2	READ	3	3	151	0.0198675
ESCA	SMARCA2	0.0184049		THYM	HDAC10	0.0243902		DPF2	SARC	3	3	239	0.0125523
PAAD	SMARCA2	0.00571429		MESO	HDAC10	0.060241		DPF2	SKCM	14	13	468	0.0277778
KIRP	SMARCA2	NA		COAD	HDAC10	0.0329114		DPF2	STAD	8	6	439	0.0136674
LIHC	SMARCA2	0.0165746		STAD	HDAC10	0.042654		DPF2	UCEC	26	22	531	0.0414313
CESC	SMARCA2	0.0337838		SKCM	HDAC10	0.0107991		DPF2	UCS	1	1	57	0.0175439
SARC	SMARCA2	0.036		KIRC	HDAC10	NA		DPF3	BLCA	4	3	411	0.00729927
BRCA	SMARCA2	0.0315186		THCA	HDAC10	0.0189873		DPF3	BRCA	3	3	1026	0.00292398
THYM	SMARCA2	NA		HNSC	HDAC10	0.01		DPF3	CESC	6	6	291	0.0206186
MESO	SMARCA2	0.0120482		LAML	HDAC10	0.0338983		DPF3	CHOL	1	1	36	0.0277778
COAD	SMARCA2	0.0126582		READ	HDAC10	0.0362319		DPF3	COAD	10	9	408	0.0220588
STAD	SMARCA2	0.021327		LGG	HDAC10	0.0214844		DPF3	ESCA	5	4	185	0.0216216
SKCM	SMARCA2	0.012959		DLBC	HDAC10	0.12766		DPF3	GBM	1	1	403	0.00248139
CHOL	SMARCA2	NA		KICH	HDAC10	NA		DPF3	HNSC	6	5	509	0.00982318
KIRC	SMARCA2	NA		UCS	HDAC10	0.0714286		DPF3	KIRP	2	2	282	0.0070922
THCA	SMARCA2	0.00421941		ACC	HDAC10	0.012987		DPF3	LIHC	1	1	365	0.00273973
HNSC	SMARCA2	0.046		PCPG	HDAC10	0.0182927		DPF3	LUAD	14	11	569	0.0193322
LAML	SMARCA2	0.0169492		UVM	HDAC10	0.0125		DPF3	LUSC	19	17	485	0.0350515
READ	SMARCA2	0.0144928		GBM	HDAC4	0.00416667		DPF3	OV	5	5	412	0.0121359
LGG	SMARCA2	0.00585938		OV	HDAC4	0.0117188		DPF3	PAAD	2	2	178	0.011236
DLBC	SMARCA2	0.0638298		LUAD	HDAC4	0.00604839		DPF3	READ	3	3	151	0.0198675
KICH	SMARCA2	NA		LUSC	HDAC4	0.0129032		DPF3	SARC	1	1	239	0.0041841
UCS	SMARCA2	NA		PRAD	HDAC4	0.0205339		DPF3	SKCM	27	18	468	0.0384615
ACC	SMARCA2	0.012987		UCEC	HDAC4	0.00809717		DPF3	STAD	11	10	439	0.022779
PCPG	SMARCA2	NA		BLCA	HDAC4	0.0492611		DPF3	THCA	1	1	500	0.002
UVM	SMARCA2	NA		TGCT	HDAC4	0.00645161		DPF3	UCEC	58	50	531	0.094162
GBM	DPF1	0.0125		ESCA	HDAC4	0.0184049		EP300	ACC	1	1	92	0.0108696
OV	DPF1	0.132812		PAAD	HDAC4	0.00571429		EP300	BLCA	64	64	411	0.155718
LUAD	DPF1	0.0403226		KIRP	HDAC4	0.0148699		EP300	BRCA	22	19	1026	0.0185185
LUSC	DPF1	0.0860215		LIHC	HDAC4	0.00552486		EP300	CESC	37	35	291	0.120275
PRAD	DPF1	0.00616016		CESC	HDAC4	0.0777027		EP300	CHOL	1	1	36	0.0277778
UCEC	DPF1	0.0546559		SARC	HDAC4	0.052		EP300	COAD	33	26	408	0.0637255
BLCA	DPF1	0.0689655		BRCA	HDAC4	0.0124164		EP300	DLBC	1	1	37	0.027027
TGCT	DPF1	NA		THYM	HDAC4	0.00813008		EP300	ESCA	11	10	185	0.0540541
ESCA	DPF1	0.0368098		MESO	HDAC4	NA		EP300	GBM	8	5	403	0.0124069
PAAD	DPF1	0.08		COAD	HDAC4	0.00506329		EP300	HNSC	38	38	509	0.0746562
KIRP	DPF1	NA		STAD	HDAC4	0.0260664		EP300	KIRC	9	9	370	0.0243243
LIHC	DPF1	0.00552486		SKCM	HDAC4	0.0237581		EP300	KIRP	16	13	282	0.0460993
CESC	DPF1	0.0439189		KIRC	HDAC4	0.0060423		EP300	LAML	6	5	140	0.0357143
SARC	DPF1	0.06		THCA	HDAC4	0.00421941		EP300	LGG	3	2	526	0.00380228
BRCA	DPF1	0.0324737		HNSC	HDAC4	0.03		EP300	LIHC	11	9	365	0.0246575
THYM	DPF1	NA		LAML	HDAC4	NA		EP300	LUAD	17	13	569	0.0228471
MESO	DPF1	0.0240964		READ	HDAC4	NA		EP300	LUSC	24	22	485	0.0453608
COAD	DPF1	0.0126582		LGG	HDAC4	0.046875		EP300	MESO	1	1	82	0.0121951
STAD	DPF1	0.0260664		DLBC	HDAC4	0.0212766		EP300	OV	12	10	412	0.0242718
SKCM	DPF1	0.0151188		KICH	HDAC4	NA		EP300	PAAD	4	4	178	0.0224719
CHOL	DPF1	0.0277778		UCS	HDAC4	NA		EP300	PRAD	6	6	498	0.0120482
KIRC	DPF1	NA		ACC	HDAC4	0.025974		EP300	READ	6	6	151	0.0397351
THCA	DPF1	NA		PCPG	HDAC4	NA		EP300	SARC	6	4	239	0.0167364
HNSC	DPF1	0.018		UVM	HDAC4	0.0375		EP300	SKCM	52	44	468	0.0940171
LAML	DPF1	NA		GBM	SMARCA4	0.00416667		EP300	STAD	29	23	439	0.0523918
READ	DPF1	NA		OV	SMARCA4	0.015625		EP300	TGCT	1	1	151	0.00662252
LGG	DPF1	0.0078125		LUAD	SMARCA4	0.016129		EP300	THCA	1	1	500	0.002
DLBC	DPF1	NA		LUSC	SMARCA4	0.0129032		EP300	THYM	2	1	123	0.00813008
KICH	DPF1	NA		PRAD	SMARCA4	0.00821355		EP300	UCEC	85	80	531	0.150659
UCS	DPF1	0.178571		UCEC	SMARCA4	NA		EP300	UCS	1	1	57	0.0175439
ACC	DPF1	NA		BLCA	SMARCA4	0.00246305		EP300	UVM	1	1	80	0.0125
PCPG	DPF1	0.0182927		TGCT	SMARCA4	NA		HAT1	BLCA	4	3	411	0.00729927
UVM	DPF1	NA		ESCA	SMARCA4	0.0122699		HAT1	BRCA	7	7	1026	0.00682261
GBM	BRD4	0.00416667		PAAD	SMARCA4	0.00571429		HAT1	CESC	2	2	291	0.00687285
OV	BRD4	0.214844		KIRP	SMARCA4	0.0111524		HAT1	COAD	9	8	408	0.0196078
LUAD	BRD4	0.00201613		LIHC	SMARCA4	0.0110497		HAT1	DLBC	1	1	37	0.027027
LUSC	BRD4	0.0215054		CESC	SMARCA4	0.0135135		HAT1	GBM	5	4	403	0.00992556
PRAD	BRD4	0.00821355		SARC	SMARCA4	NA		HAT1	HNSC	1	1	509	0.00196464
UCEC	BRD4	0.0809717		BRCA	SMARCA4	0.00286533		HAT1	KIRC	1	1	370	0.0027027
BLCA	BRD4	0.00738916		THYM	SMARCA4	NA		HAT1	KIRP	1	1	282	0.0035461
TGCT	BRD4	NA		MESO	SMARCA4	NA		HAT1	LAML	1	1	140	0.00714286
ESCA	BRD4	0.0306748		COAD	SMARCA4	0.00759494		HAT1	LGG	1	1	526	0.00190114
PAAD	BRD4	0.00571429		STAD	SMARCA4	0.014218		HAT1	LUAD	8	6	569	0.0105448
KIRP	BRD4	NA		SKCM	SMARCA4	0.00215983		HAT1	LUSC	3	3	485	0.00618557
LIHC	BRD4	0.0138122		KIRC	SMARCA4	NA		HAT1	OV	3	3	412	0.00728155
CESC	BRD4	NA		THCA	SMARCA4	0.00421941		HAT1	PCPG	1	1	184	0.00543478
SARC	BRD4	0.044		HNSC	SMARCA4	NA		HAT1	READ	1	1	151	0.00662252
BRCA	BRD4	0.0276982		LAML	SMARCA4	NA		HAT1	SKCM	8	7	468	0.0149573
THYM	BRD4	NA		READ	SMARCA4	NA		HAT1	STAD	4	4	439	0.00911162
MESO	BRD4	0.0361446		LGG	SMARCA4	NA		HAT1	UCEC	25	23	531	0.0433145
COAD	BRD4	0.00253165		DLBC	SMARCA4	0.0212766		HAT1	UCS	2	2	57	0.0350877
STAD	BRD4	0.007109		KICH	SMARCA4	NA		HAT1	UVM	1	1	80	0.0125
SKCM	BRD4	0.012959		UCS	SMARCA4	NA		HDAC1	ACC	2	1	92	0.0108696
CHOL	BRD4	NA		ACC	SMARCA4	NA		HDAC1	BLCA	6	4	411	0.00973236
KIRC	BRD4	NA		PCPG	SMARCA4	NA		HDAC1	BRCA	14	10	1026	0.00974659
THCA	BRD4	NA		UVM	SMARCA4	NA		HDAC1	COAD	7	6	408	0.0147059
HNSC	BRD4	0.014		GBM	DPF2	0.00416667		HDAC1	GBM	3	3	403	0.00744417
LAML	BRD4	NA		OV	DPF2	NA		HDAC1	HNSC	1	1	509	0.00196464
READ	BRD4	NA		LUAD	DPF2	0.00201613		HDAC1	KIRC	2	1	370	0.0027027
LGG	BRD4	0.0410156		LUSC	DPF2	NA		HDAC1	LIHC	2	1	365	0.00273973
DLBC	BRD4	NA		PRAD	DPF2	0.00205339		HDAC1	LUAD	4	4	569	0.00702988
KICH	BRD4	NA		UCEC	DPF2	NA		HDAC1	LUSC	7	4	485	0.00824742
UCS	BRD4	0.0714286		BLCA	DPF2	NA		HDAC1	MESO	1	1	82	0.0121951
ACC	BRD4	0.0909091		TGCT	DPF2	0.0258065		HDAC1	OV	3	3	412	0.00728155
PCPG	BRD4	NA		ESCA	DPF2	NA		HDAC1	PRAD	1	1	498	0.00200803
UVM	BRD4	0.0125		PAAD	DPF2	0.0114286		HDAC1	READ	3	2	151	0.013245
GBM	SMARCA4	0.00833333		KIRP	DPF2	NA		HDAC1	SKCM	10	5	468	0.0106838
OV	SMARCA4	0.148438		LIHC	DPF2	0.00828729		HDAC1	STAD	9	7	439	0.0159453
LUAD	SMARCA4	NA		CESC	DPF2	0.00337838		HDAC1	UCEC	20	13	531	0.0244821
LUSC	SMARCA4	0.0150538		SARC	DPF2	NA		HDAC10	BLCA	7	3	411	0.00729927
PRAD	SMARCA4	0.00410678		BRCA	DPF2	0.00477555		HDAC10	BRCA	4	3	1026	0.00292398
UCEC	SMARCA4	0.0728745		THYM	DPF2	NA		HDAC10	CESC	3	2	291	0.00687285
BLCA	SMARCA4	0.0197044		MESO	DPF2	NA		HDAC10	COAD	12	8	408	0.0196078
TGCT	SMARCA4	NA		COAD	DPF2	0.00506329		HDAC10	ESCA	1	1	185	0.00540541
ESCA	SMARCA4	0.00613497		STAD	DPF2	NA		HDAC10	HNSC	11	10	509	0.0196464
PAAD	SMARCA4	0.0114286		SKCM	DPF2	0.0107991		HDAC10	KIRC	2	2	370	0.00540541
KIRP	SMARCA4	NA		KIRC	DPF2	NA		HDAC10	KIRP	3	2	282	0.0070922
LIHC	SMARCA4	NA		THCA	DPF2	NA		HDAC10	LGG	2	2	526	0.00380228
CESC	SMARCA4	0.0168919		HNSC	DPF2	NA		HDAC10	LIHC	3	1	365	0.00273973
SARC	SMARCA4	0.104		LAML	DPF2	NA		HDAC10	LUAD	4	4	569	0.00702988
BRCA	SMARCA4	0.0191022		READ	DPF2	NA		HDAC10	LUSC	8	6	485	0.0123711
THYM	SMARCA4	NA		LGG	DPF2	NA		HDAC10	PRAD	1	1	498	0.00200803
MESO	SMARCA4	0.0240964		DLBC	DPF2	NA		HDAC10	READ	1	1	151	0.00662252
COAD	SMARCA4	0.00253165		KICH	DPF2	NA		HDAC10	SKCM	21	17	468	0.0363248
STAD	SMARCA4	0.0118483		UCS	DPF2	NA		HDAC10	STAD	6	6	439	0.0136674
SKCM	SMARCA4	0.00647948		ACC	DPF2	0.012987		HDAC10	TGCT	1	1	151	0.00662252
CHOL	SMARCA4	NA		PCPG	DPF2	NA		HDAC10	UCEC	30	23	531	0.0433145
KIRC	SMARCA4	NA		UVM	DPF2	NA		HDAC10	UCS	1	1	57	0.0175439
THCA	SMARCA4	NA		GBM	HDAC6	NA		HDAC11	BLCA	5	5	411	0.0121655
HNSC	SMARCA4	0.008		OV	HDAC6	0.0078125		HDAC11	BRCA	3	2	1026	0.00194932
LAML	SMARCA4	NA		LUAD	HDAC6	0.00604839		HDAC11	CESC	2	2	291	0.00687285
READ	SMARCA4	NA		LUSC	HDAC6	0.0129032		HDAC11	COAD	7	6	408	0.0147059
LGG	SMARCA4	0.0351562		PRAD	HDAC6	0.00616016		HDAC11	ESCA	2	1	185	0.00540541
DLBC	SMARCA4	NA		UCEC	HDAC6	0.00202429		HDAC11	HNSC	4	3	509	0.00589391
KICH	SMARCA4	NA		BLCA	HDAC6	0.00492611		HDAC11	KICH	1	1	66	0.0151515
UCS	SMARCA4	0.107143		TGCT	HDAC6	0.0129032		HDAC11	KIRP	2	1	282	0.0035461
ACC	SMARCA4	0.0779221		ESCA	HDAC6	0.0368098		HDAC11	LGG	2	1	526	0.00190114
PCPG	SMARCA4	0.00609756		PAAD	HDAC6	0.0114286		HDAC11	LIHC	2	2	365	0.00547945
UVM	SMARCA4	0.0125		KIRP	HDAC6	NA		HDAC11	LUAD	7	6	569	0.0105448
GBM	HDAC6	NA		LIHC	HDAC6	0.00828729		HDAC11	OV	4	3	412	0.00728155
OV	HDAC6	0.101562		CESC	HDAC6	0.0168919		HDAC11	SKCM	20	16	468	0.034188
LUAD	HDAC6	0.0141129		SARC	HDAC6	0.008		HDAC11	STAD	10	9	439	0.0205011
LUSC	HDAC6	0.00430108		BRCA	HDAC6	0.00191022		HDAC11	UCEC	25	21	531	0.039548
PRAD	HDAC6	0.0102669		THYM	HDAC6	0.00813008		HDAC2	ACC	1	1	92	0.0108696
UCEC	HDAC6	0.0263158		MESO	HDAC6	NA		HDAC2	BLCA	5	3	411	0.00729927
BLCA	HDAC6	0.00985222		COAD	HDAC6	0.00759494		HDAC2	BRCA	4	4	1026	0.00389864
TGCT	HDAC6	NA		STAD	HDAC6	0.00473934		HDAC2	CESC	5	4	291	0.0137457
ESCA	HDAC6	0.0122699		SKCM	HDAC6	NA		HDAC2	COAD	8	8	408	0.0196078
PAAD	HDAC6	0.00571429		KIRC	HDAC6	0.00302115		HDAC2	DLBC	1	1	37	0.027027
KIRP	HDAC6	NA		THCA	HDAC6	NA		HDAC2	GBM	3	3	403	0.00744417
LIHC	HDAC6	0.00276243		HNSC	HDAC6	0.02		HDAC2	HNSC	4	3	509	0.00589391
CESC	HDAC6	0.0202703		LAML	HDAC6	NA		HDAC2	KIRC	2	1	370	0.0027027
SARC	HDAC6	0.048		READ	HDAC6	0.00724638		HDAC2	LAML	1	1	140	0.00714286
BRCA	HDAC6	0.0114613		LGG	HDAC6	0.0195312		HDAC2	LGG	4	4	526	0.00760456
THYM	HDAC6	NA		DLBC	HDAC6	0.0212766		HDAC2	LIHC	3	3	365	0.00821918
MESO	HDAC6	NA		KICH	HDAC6	NA		HDAC2	LUAD	9	7	569	0.0123023
COAD	HDAC6	0.00506329		UCS	HDAC6	NA		HDAC2	LUSC	3	2	485	0.00412371
STAD	HDAC6	0.00947867		ACC	HDAC6	NA		HDAC2	MESO	1	1	82	0.0121951
SKCM	HDAC6	0.00863931		PCPG	HDAC6	NA		HDAC2	OV	1	1	412	0.00242718
CHOL	HDAC6	NA		UVM	HDAC6	NA		HDAC2	PCPG	1	1	184	0.00543478
KIRC	HDAC6	NA		GBM	KAT6A	NA		HDAC2	PRAD	2	2	498	0.00401606
THCA	HDAC6	0.0021097		OV	KAT6A	0.0078125		HDAC2	READ	3	2	151	0.013245
HNSC	HDAC6	0.002		LUAD	KAT6A	0.0201613		HDAC2	SKCM	7	4	468	0.00854701
LAML	HDAC6	0.00847458		LUSC	KAT6A	0.00430108		HDAC2	STAD	4	4	439	0.00911162
READ	HDAC6	NA		PRAD	KAT6A	0.0759754		HDAC2	UCEC	28	25	531	0.047081
LGG	HDAC6	0.0078125		UCEC	KAT6A	0.00404858		HDAC3	BLCA	4	1	411	0.00243309
DLBC	HDAC6	0.0212766		BLCA	KAT6A	0.0270936		HDAC3	BRCA	7	5	1026	0.00487329
KICH	HDAC6	NA		TGCT	KAT6A	0.00645161		HDAC3	CESC	5	5	291	0.0171821
UCS	HDAC6	0.0357143		ESCA	KAT6A	NA		HDAC3	COAD	5	5	408	0.0122549
ACC	HDAC6	0.012987		PAAD	KAT6A	NA		HDAC3	ESCA	3	2	185	0.0108108
PCPG	HDAC6	0.00609756		KIRP	KAT6A	NA		HDAC3	GBM	3	2	403	0.00496278
UVM	HDAC6	0.0125		LIHC	KAT6A	0.0607735		HDAC3	HNSC	4	4	509	0.00785855
GBM	HDAC2	NA		CESC	KAT6A	0.00337838		HDAC3	LAML	1	1	140	0.00714286
OV	HDAC2	0.0234375		SARC	KAT6A	0.008		HDAC3	LGG	1	1	526	0.00190114
LUAD	HDAC2	0.00201613		BRCA	KAT6A	0.0133715		HDAC3	LIHC	2	1	365	0.00273973
LUSC	HDAC2	0.00430108		THYM	KAT6A	NA		HDAC3	LUAD	4	4	569	0.00702988
PRAD	HDAC2	0.00205339		MESO	KAT6A	NA		HDAC3	LUSC	7	5	485	0.0103093
UCEC	HDAC2	0.00809717		COAD	KAT6A	0.00253165		HDAC3	OV	3	3	412	0.00728155
BLCA	HDAC2	NA		STAD	KAT6A	0.00947867		HDAC3	PAAD	1	1	178	0.00561798
TGCT	HDAC2	NA		SKCM	KAT6A	0.00647948		HDAC3	PRAD	3	2	498	0.00401606
ESCA	HDAC2	0.0122699		KIRC	KAT6A	0.0060423		HDAC3	READ	1	1	151	0.00662252
PAAD	HDAC2	NA		THCA	KAT6A	NA		HDAC3	SARC	1	1	239	0.0041841
KIRP	HDAC2	NA		HNSC	KAT6A	0.016		HDAC3	SKCM	20	18	468	0.0384615
LIHC	HDAC2	0.00276243		LAML	KAT6A	NA		HDAC3	STAD	10	8	439	0.0182232
CESC	HDAC2	0.00337838		READ	KAT6A	0.00724638		HDAC3	UCEC	32	29	531	0.0546139
SARC	HDAC2	0.04		LGG	KAT6A	NA		HDAC4	ACC	2	2	92	0.0217391
BRCA	HDAC2	0.0191022		DLBC	KAT6A	0.0212766		HDAC4	BLCA	10	6	411	0.0145985
THYM	HDAC2	NA		KICH	KAT6A	NA		HDAC4	BRCA	13	8	1026	0.00779727
MESO	HDAC2	NA		UCS	KAT6A	0.0178571		HDAC4	CESC	10	8	291	0.0274914
COAD	HDAC2	NA		ACC	KAT6A	NA		HDAC4	CHOL	1	1	36	0.0277778
STAD	HDAC2	0.00473934		PCPG	KAT6A	NA		HDAC4	COAD	22	20	408	0.0490196
SKCM	HDAC2	NA		UVM	KAT6A	0.0125		HDAC4	ESCA	13	13	185	0.0702703
CHOL	HDAC2	NA		GBM	SIRT2	NA		HDAC4	GBM	4	4	403	0.00992556
KIRC	HDAC2	NA		OV	SIRT2	0.0078125		HDAC4	HNSC	13	9	509	0.0176817
THCA	HDAC2	NA		LUAD	SIRT2	NA		HDAC4	KICH	1	1	66	0.0151515
HNSC	HDAC2	NA		LUSC	SIRT2	0.00215054		HDAC4	KIRC	1	1	370	0.0027027
LAML	HDAC2	NA		PRAD	SIRT2	0.00616016		HDAC4	KIRP	4	3	282	0.0106383
READ	HDAC2	NA		UCEC	SIRT2	NA		HDAC4	LAML	1	1	140	0.00714286
LGG	HDAC2	NA		BLCA	SIRT2	0.00246305		HDAC4	LGG	7	4	526	0.00760456
DLBC	HDAC2	NA		TGCT	SIRT2	NA		HDAC4	LIHC	7	6	365	0.0164384
KICH	HDAC2	NA		ESCA	SIRT2	NA		HDAC4	LUAD	31	24	569	0.0421793
UCS	HDAC2	NA		PAAD	SIRT2	NA		HDAC4	LUSC	26	15	485	0.0309278
ACC	HDAC2	0.038961		KIRP	SIRT2	0.00743494		HDAC4	OV	6	4	412	0.00970874
PCPG	HDAC2	NA		LIHC	SIRT2	0.00276243		HDAC4	PAAD	2	1	178	0.00561798
UVM	HDAC2	NA		CESC	SIRT2	NA		HDAC4	PRAD	1	1	498	0.00200803
GBM	HAT1	NA		SARC	SIRT2	NA		HDAC4	READ	4	1	151	0.00662252
OV	HAT1	0.0820312		BRCA	SIRT2	0.00191022		HDAC4	SARC	4	4	239	0.0167364
LUAD	HAT1	0.016129		THYM	SIRT2	0.0162602		HDAC4	SKCM	41	28	468	0.0598291
LUSC	HAT1	0.0150538		MESO	SIRT2	NA		HDAC4	STAD	28	25	439	0.0569476
PRAD	HAT1	0.00616016		COAD	SIRT2	NA		HDAC4	THYM	5	5	123	0.0406504
UCEC	HAT1	0.0121457		STAD	SIRT2	NA		HDAC4	UCEC	79	73	531	0.137476
BLCA	HAT1	0.00738916		SKCM	SIRT2	NA		HDAC5	ACC	3	2	92	0.0217391
TGCT	HAT1	0.00645161		KIRC	SIRT2	NA		HDAC5	BLCA	9	7	411	0.0170316
ESCA	HAT1	0.0306748		THCA	SIRT2	NA		HDAC5	BRCA	10	9	1026	0.00877193
PAAD	HAT1	0.0171429		HNSC	SIRT2	NA		HDAC5	CESC	8	7	291	0.024055
KIRP	HAT1	0.0185874		LAML	SIRT2	NA		HDAC5	COAD	22	18	408	0.0441176
LIHC	HAT1	0.0110497		READ	SIRT2	NA		HDAC5	DLBC	1	1	37	0.027027
CESC	HAT1	0.0135135		LGG	SIRT2	0.0175781		HDAC5	ESCA	7	4	185	0.0216216
SARC	HAT1	0.012		DLBC	SIRT2	NA		HDAC5	GBM	4	4	403	0.00992556
BRCA	HAT1	0.0105062		KICH	SIRT2	NA		HDAC5	HNSC	6	3	509	0.00589391
THYM	HAT1	NA		UCS	SIRT2	NA		HDAC5	KICH	1	1	66	0.0151515
MESO	HAT1	0.0120482		ACC	SIRT2	NA		HDAC5	KIRP	3	3	282	0.0106383
COAD	HAT1	NA		PCPG	SIRT2	NA		HDAC5	LGG	3	2	526	0.00380228
STAD	HAT1	0.007109		UVM	SIRT2	NA		HDAC5	LIHC	3	3	365	0.00821918
SKCM	HAT1	0.00215983		GBM	CREBBP	NA		HDAC5	LUAD	9	6	569	0.0105448
CHOL	HAT1	0.0277778		OV	CREBBP	0.0078125		HDAC5	LUSC	7	5	485	0.0103093
KIRC	HAT1	0.0120846		LUAD	CREBBP	0.00201613		HDAC5	PAAD	2	2	178	0.011236
THCA	HAT1	NA		LUSC	CREBBP	0.00860215		HDAC5	PRAD	5	5	498	0.0100402
HNSC	HAT1	0.028		PRAD	CREBBP	NA		HDAC5	READ	2	2	151	0.013245
LAML	HAT1	NA		UCEC	CREBBP	0.0101215		HDAC5	SARC	5	4	239	0.0167364
READ	HAT1	NA		BLCA	CREBBP	0.0369458		HDAC5	SKCM	34	27	468	0.0576923
LGG	HAT1	0.00390625		TGCT	CREBBP	NA		HDAC5	STAD	16	13	439	0.0296128
DLBC	HAT1	NA		ESCA	CREBBP	0.00613497		HDAC5	UCEC	48	37	531	0.0696798
KICH	HAT1	NA		PAAD	CREBBP	0.00571429		HDAC5	UVM	2	2	80	0.025
UCS	HAT1	0.0357143		KIRP	CREBBP	NA		HDAC6	ACC	2	2	92	0.0217391
ACC	HAT1	NA		LIHC	CREBBP	0.00828729		HDAC6	BLCA	12	10	411	0.0243309
PCPG	HAT1	NA		CESC	CREBBP	0.00675676		HDAC6	BRCA	19	15	1026	0.0146199
UVM	HAT1	NA		SARC	CREBBP	NA		HDAC6	CESC	9	8	291	0.0274914
GBM	HDAC3	NA		BRCA	CREBBP	0.00573066		HDAC6	COAD	16	14	408	0.0343137
OV	HDAC3	0.0390625		THYM	CREBBP	NA		HDAC6	ESCA	3	3	185	0.0162162
LUAD	HDAC3	0.00403226		MESO	CREBBP	NA		HDAC6	GBM	4	3	403	0.00744417
LUSC	HDAC3	NA		COAD	CREBBP	0.00253165		HDAC6	HNSC	9	7	509	0.0137525
PRAD	HDAC3	0.0123203		STAD	CREBBP	0.0331754		HDAC6	KIRC	4	2	370	0.00540541
UCEC	HDAC3	0.00202429		SKCM	CREBBP	NA		HDAC6	KIRP	4	3	282	0.0106383
BLCA	HDAC3	0.00738916		KIRC	CREBBP	NA		HDAC6	LGG	5	5	526	0.0095057
TGCT	HDAC3	NA		THCA	CREBBP	NA		HDAC6	LIHC	3	3	365	0.00821918
ESCA	HDAC3	NA		HNSC	CREBBP	NA		HDAC6	LUAD	19	16	569	0.0281195
PAAD	HDAC3	0.00571429		LAML	CREBBP	NA		HDAC6	LUSC	12	11	485	0.0226804
KIRP	HDAC3	0.0111524		READ	CREBBP	0.00724638		HDAC6	OV	8	5	412	0.0121359
LIHC	HDAC3	0.0138122		LGG	CREBBP	NA		HDAC6	PAAD	1	1	178	0.00561798
CESC	HDAC3	0.00675676		DLBC	CREBBP	NA		HDAC6	PRAD	2	2	498	0.00401606
SARC	HDAC3	0.016		KICH	CREBBP	NA		HDAC6	READ	6	3	151	0.0198675
BRCA	HDAC3	0.00668577		UCS	CREBBP	NA		HDAC6	SARC	3	3	239	0.0125523
THYM	HDAC3	NA		ACC	CREBBP	NA		HDAC6	SKCM	22	13	468	0.0277778
MESO	HDAC3	NA		PCPG	CREBBP	NA		HDAC6	STAD	12	9	439	0.0205011
COAD	HDAC3	NA		UVM	CREBBP	NA		HDAC6	UCEC	68	61	531	0.114878
STAD	HDAC3	0.007109		GBM	EP300	NA		HDAC6	UCS	2	2	57	0.0350877
SKCM	HDAC3	0.00431965		OV	EP300	0.0078125		HDAC7	ACC	2	1	92	0.0108696
CHOL	HDAC3	0.0277778		LUAD	EP300	0.00201613		HDAC7	BLCA	5	3	411	0.00729927
KIRC	HDAC3	0.223565		LUSC	EP300	NA		HDAC7	BRCA	2	2	1026	0.00194932
THCA	HDAC3	0.00421941		PRAD	EP300	0.00821355		HDAC7	CESC	6	5	291	0.0171821
HNSC	HDAC3	0.002		UCEC	EP300	NA		HDAC7	COAD	16	11	408	0.0269608
LAML	HDAC3	NA		BLCA	EP300	0.00985222		HDAC7	GBM	1	1	403	0.00248139
READ	HDAC3	NA		TGCT	EP300	NA		HDAC7	HNSC	6	6	509	0.0117878
LGG	HDAC3	0.00195312		ESCA	EP300	NA		HDAC7	KICH	2	1	66	0.0151515
DLBC	HDAC3	NA		PAAD	EP300	NA		HDAC7	KIRC	2	2	370	0.00540541
KICH	HDAC3	NA		KIRP	EP300	0.00743494		HDAC7	KIRP	4	4	282	0.0141844
UCS	HDAC3	0.0178571		LIHC	EP300	0.00552486		HDAC7	LGG	3	2	526	0.00380228
ACC	HDAC3	0.038961		CESC	EP300	0.0135135		HDAC7	LIHC	2	1	365	0.00273973
PCPG	HDAC3	NA		SARC	EP300	NA		HDAC7	LUAD	6	5	569	0.00878735
UVM	HDAC3	NA		BRCA	EP300	0.00286533		HDAC7	LUSC	7	4	485	0.00824742
GBM	BRD2	NA		THYM	EP300	0.0162602		HDAC7	OV	5	2	412	0.00485437
OV	BRD2	0.0859375		MESO	EP300	0.0120482		HDAC7	PAAD	1	1	178	0.00561798
LUAD	BRD2	0.0302419		COAD	EP300	0.00506329		HDAC7	PRAD	1	1	498	0.00200803
LUSC	BRD2	0.00645161		STAD	EP300	0.00236967		HDAC7	READ	2	2	151	0.013245
PRAD	BRD2	0.00616016		SKCM	EP300	NA		HDAC7	SARC	4	4	239	0.0167364
UCEC	BRD2	0.0222672		KIRC	EP300	NA		HDAC7	SKCM	33	23	468	0.0491453
BLCA	BRD2	0.0147783		THCA	EP300	0.00843882		HDAC7	STAD	19	15	439	0.0341686
TGCT	BRD2	NA		HNSC	EP300	0.004		HDAC7	THCA	2	1	500	0.002
ESCA	BRD2	0.0306748		LAML	EP300	NA		HDAC7	UCEC	27	23	531	0.0433145
PAAD	BRD2	0.0171429		READ	EP300	0.00724638		HDAC7	UCS	2	2	57	0.0350877
KIRP	BRD2	NA		LGG	EP300	0.0078125		HDAC8	BLCA	6	6	411	0.0145985
LIHC	BRD2	0.0552486		DLBC	EP300	NA		HDAC8	BRCA	8	7	1026	0.00682261
CESC	BRD2	0.0202703		KICH	EP300	NA		HDAC8	CESC	6	6	291	0.0206186
SARC	BRD2	0.004		UCS	EP300	0.0178571		HDAC8	COAD	9	9	408	0.0220588
BRCA	BRD2	0.0219675		ACC	EP300	NA		HDAC8	DLBC	1	1	37	0.027027
THYM	BRD2	NA		PCPG	EP300	0.0121951		HDAC8	GBM	5	3	403	0.00744417
MESO	BRD2	NA		UVM	EP300	NA		HDAC8	HNSC	4	3	509	0.00589391
COAD	BRD2	0.00253165		GBM	HDAC9	NA		HDAC8	KICH	1	1	66	0.0151515
STAD	BRD2	0.00947867		OV	HDAC9	0.0234375		HDAC8	KIRP	2	2	282	0.0070922
SKCM	BRD2	0.0799136		LUAD	HDAC9	0.00403226		HDAC8	LIHC	3	3	365	0.00821918
CHOL	BRD2	0.0277778		LUSC	HDAC9	0.00215054		HDAC8	LUAD	2	2	569	0.00351494
KIRC	BRD2	NA		PRAD	HDAC9	0.0102669		HDAC8	LUSC	4	2	485	0.00412371
THCA	BRD2	NA		UCEC	HDAC9	0.00404858		HDAC8	OV	4	4	412	0.00970874
HNSC	BRD2	0.006		BLCA	HDAC9	0.00492611		HDAC8	PRAD	1	1	498	0.00200803
LAML	BRD2	NA		TGCT	HDAC9	NA		HDAC8	READ	3	3	151	0.0198675
READ	BRD2	0.0217391		ESCA	HDAC9	0.00613497		HDAC8	SARC	1	1	239	0.0041841
LGG	BRD2	0.0078125		PAAD	HDAC9	NA		HDAC8	SKCM	21	17	468	0.0363248
DLBC	BRD2	0.0212766		KIRP	HDAC9	NA		HDAC8	STAD	5	4	439	0.00911162
KICH	BRD2	NA		LIHC	HDAC9	NA		HDAC8	TGCT	1	1	151	0.00662252
UCS	BRD2	0.0178571		CESC	HDAC9	NA		HDAC8	THCA	1	1	500	0.002
ACC	BRD2	NA		SARC	HDAC9	NA		HDAC8	UCEC	43	39	531	0.0734463
PCPG	BRD2	0.00609756		BRCA	HDAC9	NA		HDAC8	UCS	2	1	57	0.0175439
UVM	BRD2	0.1375		THYM	HDAC9	NA		HDAC9	ACC	2	1	92	0.0108696
GBM	HDAC1	NA		MESO	HDAC9	NA		HDAC9	BLCA	13	7	411	0.0170316
OV	HDAC1	0.0703125		COAD	HDAC9	NA		HDAC9	BRCA	9	7	1026	0.00682261
LUAD	HDAC1	0.0120968		STAD	HDAC9	NA		HDAC9	CESC	8	6	291	0.0206186
LUSC	HDAC1	0.00215054		SKCM	HDAC9	NA		HDAC9	CHOL	1	1	36	0.0277778
PRAD	HDAC1	0.00821355		KIRC	HDAC9	NA		HDAC9	COAD	42	31	408	0.0759804
UCEC	HDAC1	0.0222672		THCA	HDAC9	NA		HDAC9	DLBC	2	2	37	0.0540541
BLCA	HDAC1	0.00492611		HNSC	HDAC9	NA		HDAC9	ESCA	9	8	185	0.0432432
TGCT	HDAC1	NA		LAML	HDAC9	0.0169492		HDAC9	GBM	9	6	403	0.0148883
ESCA	HDAC1	0.0184049		READ	HDAC9	NA		HDAC9	HNSC	21	17	509	0.0333988
PAAD	HDAC1	NA		LGG	HDAC9	0.00195312		HDAC9	KICH	1	1	66	0.0151515
KIRP	HDAC1	NA		DLBC	HDAC9	0.0638298		HDAC9	KIRC	4	3	370	0.00810811
LIHC	HDAC1	0.00276243		KICH	HDAC9	NA		HDAC9	KIRP	4	2	282	0.0070922
CESC	HDAC1	0.00675676		UCS	HDAC9	NA		HDAC9	LGG	2	2	526	0.00380228
SARC	HDAC1	0.028		ACC	HDAC9	NA		HDAC9	LIHC	12	10	365	0.0273973
BRCA	HDAC1	0.0095511		PCPG	HDAC9	NA		HDAC9	LUAD	61	48	569	0.0843585
THYM	HDAC1	NA		UVM	HDAC9	NA		HDAC9	LUSC	36	31	485	0.0639175
MESO	HDAC1	0.0120482		GBM	BAZ2B	NA		HDAC9	OV	6	5	412	0.0121359
COAD	HDAC1	NA		OV	BAZ2B	0.00390625		HDAC9	PAAD	4	3	178	0.0168539
STAD	HDAC1	0.0165877		LUAD	BAZ2B	0.00201613		HDAC9	PRAD	3	2	498	0.00401606
SKCM	HDAC1	0.0194384		LUSC	BAZ2B	NA		HDAC9	READ	11	8	151	0.0529801
CHOL	HDAC1	NA		PRAD	BAZ2B	0.0349076		HDAC9	SARC	2	1	239	0.0041841
KIRC	HDAC1	NA		UCEC	BAZ2B	NA		HDAC9	SKCM	95	74	468	0.15812
THCA	HDAC1	NA		BLCA	BAZ2B	NA		HDAC9	STAD	21	15	439	0.0341686
HNSC	HDAC1	0.004		TGCT	BAZ2B	0.00645161		HDAC9	THCA	1	1	500	0.002
LAML	HDAC1	0.00847458		ESCA	BAZ2B	0.00613497		HDAC9	UCEC	51	43	531	0.0809793
READ	HDAC1	0.00724638		PAAD	BAZ2B	0.00571429		KAT2A	BLCA	10	9	411	0.0218978
LGG	HDAC1	0.00390625		KIRP	BAZ2B	NA		KAT2A	BRCA	6	4	1026	0.00389864
DLBC	HDAC1	NA		LIHC	BAZ2B	0.00828729		KAT2A	CESC	9	6	291	0.0206186
KICH	HDAC1	NA		CESC	BAZ2B	0.00675676		KAT2A	COAD	11	7	408	0.0171569
UCS	HDAC1	NA		SARC	BAZ2B	0.012		KAT2A	ESCA	2	2	185	0.0108108
ACC	HDAC1	NA		BRCA	BAZ2B	NA		KAT2A	HNSC	4	2	509	0.00392927
PCPG	HDAC1	NA		THYM	BAZ2B	0.00813008		KAT2A	KIRC	2	2	370	0.00540541
UVM	HDAC1	NA		MESO	BAZ2B	NA		KAT2A	KIRP	1	1	282	0.0035461
GBM	PBRM1	NA		COAD	BAZ2B	0.00506329		KAT2A	LGG	2	1	526	0.00190114
OV	PBRM1	0.0117188		STAD	BAZ2B	0.0118483		KAT2A	LIHC	1	1	365	0.00273973
LUAD	PBRM1	0.00201613		SKCM	BAZ2B	NA		KAT2A	LUAD	12	8	569	0.0140598
LUSC	PBRM1	NA		KIRC	BAZ2B	NA		KAT2A	LUSC	4	4	485	0.00824742
PRAD	PBRM1	0.00205339		THCA	BAZ2B	NA		KAT2A	OV	2	2	412	0.00485437
UCEC	PBRM1	0.0283401		HNSC	BAZ2B	0.002		KAT2A	PAAD	1	1	178	0.00561798
BLCA	PBRM1	0.00985222		LAML	BAZ2B	NA		KAT2A	PRAD	1	1	498	0.00200803
TGCT	PBRM1	NA		READ	BAZ2B	0.00724638		KAT2A	READ	3	3	151	0.0198675
ESCA	PBRM1	0.0122699		LGG	BAZ2B	NA		KAT2A	SARC	3	2	239	0.0083682
PAAD	PBRM1	NA		DLBC	BAZ2B	0.0638298		KAT2A	SKCM	25	20	468	0.042735
KIRP	PBRM1	NA		KICH	BAZ2B	NA		KAT2A	STAD	10	7	439	0.0159453
LIHC	PBRM1	0.00828729		UCS	BAZ2B	NA		KAT2A	THCA	2	1	500	0.002
CESC	PBRM1	NA		ACC	BAZ2B	NA		KAT2A	UCEC	37	29	531	0.0546139
SARC	PBRM1	0.004		PCPG	BAZ2B	NA		KAT2A	UVM	1	1	80	0.0125
BRCA	PBRM1	0.00095511		UVM	BAZ2B	NA		KAT2B	BLCA	12	4	411	0.00973236
THYM	PBRM1	NA		GBM	HDAC3	NA		KAT2B	BRCA	8	6	1026	0.00584795
MESO	PBRM1	NA		OV	HDAC3	0.00390625		KAT2B	CESC	4	4	291	0.0137457
COAD	PBRM1	NA		LUAD	HDAC3	0.00201613		KAT2B	COAD	19	17	408	0.0416667
STAD	PBRM1	0.00236967		LUSC	HDAC3	0.00645161		KAT2B	DLBC	3	1	37	0.027027
SKCM	PBRM1	0.00431965		PRAD	HDAC3	0.00616016		KAT2B	ESCA	3	2	185	0.0108108
CHOL	PBRM1	NA		UCEC	HDAC3	NA		KAT2B	GBM	4	3	403	0.00744417
KIRC	PBRM1	NA		BLCA	HDAC3	0.00492611		KAT2B	HNSC	7	4	509	0.00785855
THCA	PBRM1	0.0021097		TGCT	HDAC3	NA		KAT2B	KIRC	3	2	370	0.00540541
HNSC	PBRM1	NA		ESCA	HDAC3	NA		KAT2B	KIRP	3	2	282	0.0070922
LAML	PBRM1	NA		PAAD	HDAC3	NA		KAT2B	LAML	1	1	140	0.00714286
READ	PBRM1	NA		KIRP	HDAC3	NA		KAT2B	LIHC	3	2	365	0.00547945
LGG	PBRM1	0.00390625		LIHC	HDAC3	NA		KAT2B	LUAD	12	11	569	0.0193322
DLBC	PBRM1	NA		CESC	HDAC3	NA		KAT2B	LUSC	10	8	485	0.0164948
KICH	PBRM1	NA		SARC	HDAC3	0.004		KAT2B	MESO	1	1	82	0.0121951
UCS	PBRM1	NA		BRCA	HDAC3	0.00764088		KAT2B	PAAD	1	1	178	0.00561798
ACC	PBRM1	NA		THYM	HDAC3	NA		KAT2B	PRAD	1	1	498	0.00200803
PCPG	PBRM1	0.00609756		MESO	HDAC3	0.0120482		KAT2B	READ	4	4	151	0.0264901
UVM	PBRM1	NA		COAD	HDAC3	0.00506329		KAT2B	SARC	4	3	239	0.0125523
GBM	DPF2	NA		STAD	HDAC3	NA		KAT2B	SKCM	29	23	468	0.0491453
OV	DPF2	0.0429688		SKCM	HDAC3	0.0107991		KAT2B	STAD	17	16	439	0.0364465
LUAD	DPF2	0.0100806		KIRC	HDAC3	NA		KAT2B	UCEC	53	52	531	0.0979284
LUSC	DPF2	0.00860215		THCA	HDAC3	NA		KAT2B	UCS	1	1	57	0.0175439
PRAD	DPF2	0.0164271		HNSC	HDAC3	0.004		KAT6A	ACC	1	1	92	0.0108696
UCEC	DPF2	0.0182186		LAML	HDAC3	0.059322		KAT6A	BLCA	19	18	411	0.0437956
BLCA	DPF2	0.0221675		READ	HDAC3	NA		KAT6A	BRCA	24	23	1026	0.0224172
TGCT	DPF2	NA		LGG	HDAC3	0.00390625		KAT6A	CESC	14	12	291	0.0412371
ESCA	DPF2	0.0245399		DLBC	HDAC3	NA		KAT6A	CHOL	5	5	36	0.138889
PAAD	DPF2	NA		KICH	HDAC3	NA		KAT6A	COAD	29	21	408	0.0514706
KIRP	DPF2	NA		UCS	HDAC3	NA		KAT6A	DLBC	1	1	37	0.027027
LIHC	DPF2	0.00552486		ACC	HDAC3	NA		KAT6A	ESCA	9	8	185	0.0432432
CESC	DPF2	0.0101351		PCPG	HDAC3	0.00609756		KAT6A	GBM	5	4	403	0.00992556
SARC	DPF2	0.012		UVM	HDAC3	0.0125		KAT6A	HNSC	12	8	509	0.0157171
BRCA	DPF2	0.0191022		GBM	DPF3	NA		KAT6A	KIRC	8	8	370	0.0216216
THYM	DPF2	NA		OV	DPF3	0.00390625		KAT6A	KIRP	8	7	282	0.0248227
MESO	DPF2	0.0120482		LUAD	DPF3	0.00806452		KAT6A	LAML	1	1	140	0.00714286
COAD	DPF2	NA		LUSC	DPF3	0.00215054		KAT6A	LGG	5	3	526	0.00570342
STAD	DPF2	0.0118483		PRAD	DPF3	0.0102669		KAT6A	LIHC	6	4	365	0.0109589
SKCM	DPF2	0.00647948		UCEC	DPF3	0.00404858		KAT6A	LUAD	21	16	569	0.0281195
CHOL	DPF2	NA		BLCA	DPF3	0.00492611		KAT6A	LUSC	23	18	485	0.0371134
KIRC	DPF2	NA		TGCT	DPF3	NA		KAT6A	OV	8	7	412	0.0169903
THCA	DPF2	NA		ESCA	DPF3	0.00613497		KAT6A	PAAD	4	4	178	0.0224719
HNSC	DPF2	0.038		PAAD	DPF3	0.00571429		KAT6A	PCPG	2	1	184	0.00543478
LAML	DPF2	0.00847458		KIRP	DPF3	0.00743494		KAT6A	PRAD	3	3	498	0.0060241
READ	DPF2	NA		LIHC	DPF3	0.0110497		KAT6A	READ	4	4	151	0.0264901
LGG	DPF2	0.00976562		CESC	DPF3	0.0101351		KAT6A	SARC	7	7	239	0.0292887
DLBC	DPF2	0.0212766		SARC	DPF3	NA		KAT6A	SKCM	51	34	468	0.0726496
KICH	DPF2	NA		BRCA	DPF3	0.00382044		KAT6A	STAD	39	33	439	0.0751708
UCS	DPF2	0.0178571		THYM	DPF3	NA		KAT6A	THCA	1	1	500	0.002
ACC	DPF2	NA		MESO	DPF3	0.0120482		KAT6A	THYM	1	1	123	0.00813008
PCPG	DPF2	0.0121951		COAD	DPF3	NA		KAT6A	UCEC	74	64	531	0.120527
UVM	DPF2	0.0125		STAD	DPF3	0.007109		KAT6A	UCS	1	1	57	0.0175439
GBM	HDAC11	NA		SKCM	DPF3	0.00647948		KAT6A	UVM	1	1	80	0.0125
OV	HDAC11	0.03125		KIRC	DPF3	0.00906344		KAT6B	BLCA	18	12	411	0.0291971
LUAD	HDAC11	0.00201613		THCA	DPF3	NA		KAT6B	BRCA	25	22	1026	0.0214425
LUSC	HDAC11	NA		HNSC	DPF3	0.002		KAT6B	CESC	12	11	291	0.0378007
PRAD	HDAC11	0.00821355		LAML	DPF3	NA		KAT6B	COAD	22	19	408	0.0465686
UCEC	HDAC11	0.0384615		READ	DPF3	0.00724638		KAT6B	ESCA	4	3	185	0.0162162
BLCA	HDAC11	0.08867		LGG	DPF3	0.0117188		KAT6B	GBM	5	5	403	0.0124069
TGCT	HDAC11	NA		DLBC	DPF3	NA		KAT6B	HNSC	9	7	509	0.0137525
ESCA	HDAC11	0.0368098		KICH	DPF3	NA		KAT6B	KIRC	5	4	370	0.0108108
PAAD	HDAC11	0.00571429		UCS	DPF3	NA		KAT6B	KIRP	4	3	282	0.0106383
KIRP	HDAC11	NA		ACC	DPF3	NA		KAT6B	LAML	2	2	140	0.0142857
LIHC	HDAC11	0.0220994		PCPG	DPF3	NA		KAT6B	LGG	11	11	526	0.0209125
CESC	HDAC11	0.0168919		UVM	DPF3	NA		KAT6B	LIHC	8	5	365	0.0136986
SARC	HDAC11	0.04		GBM	PBRM1	NA		KAT6B	LUAD	21	16	569	0.0281195
BRCA	HDAC11	0.0143266		OV	PBRM1	0.00390625		KAT6B	LUSC	18	14	485	0.028866
THYM	HDAC11	NA		LUAD	PBRM1	0.00403226		KAT6B	MESO	1	1	82	0.0121951
MESO	HDAC11	0.0120482		LUSC	PBRM1	0.0150538		KAT6B	OV	11	11	412	0.026699
COAD	HDAC11	NA		PRAD	PBRM1	0.00821355		KAT6B	PAAD	2	2	178	0.011236
STAD	HDAC11	0.007109		UCEC	PBRM1	0.00809717		KAT6B	PRAD	6	6	498	0.0120482
SKCM	HDAC11	0.0107991		BLCA	PBRM1	0.0270936		KAT6B	READ	6	4	151	0.0264901
CHOL	HDAC11	NA		TGCT	PBRM1	NA		KAT6B	SARC	2	1	239	0.0041841
KIRC	HDAC11	NA		ESCA	PBRM1	0.00613497		KAT6B	SKCM	57	43	468	0.0918803
THCA	HDAC11	0.0021097		PAAD	PBRM1	0.00571429		KAT6B	STAD	25	19	439	0.0432802
HNSC	HDAC11	0.002		KIRP	PBRM1	0.00371747		KAT6B	THCA	2	2	500	0.004
LAML	HDAC11	NA		LIHC	PBRM1	0.00828729		KAT6B	UCEC	66	59	531	0.111111
READ	HDAC11	0.00724638		CESC	PBRM1	0.027027		KAT7	BLCA	14	12	411	0.0291971
LGG	HDAC11	0.015625		SARC	PBRM1	0.028		KAT7	BRCA	4	4	1026	0.00389864
DLBC	HDAC11	NA		BRCA	PBRM1	0.0105062		KAT7	CESC	6	6	291	0.0206186
KICH	HDAC11	NA		THYM	PBRM1	NA		KAT7	COAD	9	9	408	0.0220588
UCS	HDAC11	0.0535714		MESO	PBRM1	0.0722892		KAT7	GBM	1	1	403	0.00248139
ACC	HDAC11	NA		COAD	PBRM1	0.0151899		KAT7	HNSC	5	3	509	0.00589391
PCPG	HDAC11	0.00609756		STAD	PBRM1	0.0189573		KAT7	KICH	1	1	66	0.0151515
UVM	HDAC11	NA		SKCM	PBRM1	NA		KAT7	KIRC	2	2	370	0.00540541
GBM	BAZ2B	NA		KIRC	PBRM1	0.217523		KAT7	KIRP	3	3	282	0.0106383
OV	BAZ2B	0.0664062		THCA	PBRM1	NA		KAT7	LGG	1	1	526	0.00190114
LUAD	BAZ2B	0.0100806		HNSC	PBRM1	0.018		KAT7	LIHC	3	3	365	0.00821918
LUSC	BAZ2B	0.0129032		LAML	PBRM1	0.00847458		KAT7	LUAD	7	6	569	0.0105448
PRAD	BAZ2B	0.00616016		READ	PBRM1	0.0144928		KAT7	LUSC	9	9	485	0.0185567
UCEC	BAZ2B	0.01417		LGG	PBRM1	0.0195312		KAT7	OV	3	2	412	0.00485437
BLCA	BAZ2B	0.0172414		DLBC	PBRM1	0.0425532		KAT7	PRAD	2	2	498	0.00401606
TGCT	BAZ2B	0.00645161		KICH	PBRM1	NA		KAT7	READ	6	6	151	0.0397351
ESCA	BAZ2B	0.0245399		UCS	PBRM1	0.0178571		KAT7	SARC	2	1	239	0.0041841
PAAD	BAZ2B	0.0171429		ACC	PBRM1	NA		KAT7	SKCM	13	9	468	0.0192308
KIRP	BAZ2B	0.0111524		PCPG	PBRM1	NA		KAT7	STAD	7	5	439	0.0113895
LIHC	BAZ2B	0.0110497		UVM	PBRM1	NA		KAT7	UCEC	41	40	531	0.0753296
CESC	BAZ2B	0.00675676		GBM	DPF1	NA		KAT7	UCS	1	1	57	0.0175439
SARC	BAZ2B	0.008		OV	DPF1	0.00390625		KAT8	BLCA	8	7	411	0.0170316
BRCA	BAZ2B	0.00668577		LUAD	DPF1	NA		KAT8	BRCA	5	5	1026	0.00487329
THYM	BAZ2B	NA		LUSC	DPF1	NA		KAT8	CESC	3	3	291	0.0103093
MESO	BAZ2B	0.0120482		PRAD	DPF1	0.00410678		KAT8	COAD	8	6	408	0.0147059
COAD	BAZ2B	NA		UCEC	DPF1	NA		KAT8	ESCA	3	3	185	0.0162162
STAD	BAZ2B	0.00236967		BLCA	DPF1	NA		KAT8	GBM	3	2	403	0.00496278
SKCM	BAZ2B	NA		TGCT	DPF1	0.00645161		KAT8	HNSC	4	4	509	0.00785855
CHOL	BAZ2B	NA		ESCA	DPF1	NA		KAT8	KIRC	3	2	370	0.00540541
KIRC	BAZ2B	0.0060423		PAAD	DPF1	NA		KAT8	KIRP	1	1	282	0.0035461
THCA	BAZ2B	NA		KIRP	DPF1	0.00743494		KAT8	LGG	1	1	526	0.00190114
HNSC	BAZ2B	0.008		LIHC	DPF1	0.00276243		KAT8	LIHC	1	1	365	0.00273973
LAML	BAZ2B	NA		CESC	DPF1	NA		KAT8	LUAD	7	5	569	0.00878735
READ	BAZ2B	NA		SARC	DPF1	NA		KAT8	LUSC	11	9	485	0.0185567
LGG	BAZ2B	0.00195312		BRCA	DPF1	0.00191022		KAT8	MESO	1	1	82	0.0121951
DLBC	BAZ2B	NA		THYM	DPF1	0.0162602		KAT8	OV	3	3	412	0.00728155
KICH	BAZ2B	NA		MESO	DPF1	NA		KAT8	READ	1	1	151	0.00662252
UCS	BAZ2B	0.0178571		COAD	DPF1	NA		KAT8	SARC	1	1	239	0.0041841
ACC	BAZ2B	NA		STAD	DPF1	0.00236967		KAT8	SKCM	15	11	468	0.0235043
PCPG	BAZ2B	NA		SKCM	DPF1	0.00215983		KAT8	STAD	14	13	439	0.0296128
UVM	BAZ2B	NA		KIRC	DPF1	NA		KAT8	THCA	1	1	500	0.002
GBM	KAT2B	NA		THCA	DPF1	NA		KAT8	UCEC	23	18	531	0.0338983
OV	KAT2B	0.0195312		HNSC	DPF1	NA		PBRM1	ACC	2	1	92	0.0108696
LUAD	KAT2B	NA		LAML	DPF1	NA		PBRM1	BLCA	22	20	411	0.0486618
LUSC	KAT2B	0.00215054		READ	DPF1	NA		PBRM1	BRCA	16	13	1026	0.0126706
PRAD	KAT2B	0.00821355		LGG	DPF1	0.0136719		PBRM1	CESC	13	9	291	0.0309278
UCEC	KAT2B	0.0121457		DLBC	DPF1	NA		PBRM1	CHOL	8	8	36	0.222222
BLCA	KAT2B	0.0541872		KICH	DPF1	NA		PBRM1	COAD	24	23	408	0.0563725
TGCT	KAT2B	NA		UCS	DPF1	NA		PBRM1	DLBC	1	1	37	0.027027
ESCA	KAT2B	0.0122699		ACC	DPF1	NA		PBRM1	ESCA	5	5	185	0.027027
PAAD	KAT2B	0.0171429		PCPG	DPF1	NA		PBRM1	GBM	3	3	403	0.00744417
KIRP	KAT2B	NA		UVM	DPF1	NA		PBRM1	HNSC	17	14	509	0.0275049
LIHC	KAT2B	0.0138122		GBM	HDAC1	NA		PBRM1	KICH	1	1	66	0.0151515
CESC	KAT2B	0.0101351		OV	HDAC1	0.00390625		PBRM1	KIRC	157	157	370	0.424324
SARC	KAT2B	0.024		LUAD	HDAC1	0.00604839		PBRM1	KIRP	12	12	282	0.0425532
BRCA	KAT2B	0.0114613		LUSC	HDAC1	0.00215054		PBRM1	LAML	3	3	140	0.0214286
THYM	KAT2B	0.00813008		PRAD	HDAC1	0.00410678		PBRM1	LGG	9	6	526	0.0114068
MESO	KAT2B	NA		UCEC	HDAC1	NA		PBRM1	LIHC	7	7	365	0.0191781
COAD	KAT2B	NA		BLCA	HDAC1	0.00492611		PBRM1	LUAD	14	13	569	0.0228471
STAD	KAT2B	0.00473934		TGCT	HDAC1	0.00645161		PBRM1	LUSC	15	13	485	0.0268041
SKCM	KAT2B	0.012959		ESCA	HDAC1	NA		PBRM1	MESO	3	3	82	0.0365854
CHOL	KAT2B	0.0277778		PAAD	HDAC1	0.00571429		PBRM1	OV	3	2	412	0.00485437
KIRC	KAT2B	NA		KIRP	HDAC1	0.00371747		PBRM1	PAAD	5	5	178	0.0280899
THCA	KAT2B	0.0021097		LIHC	HDAC1	0.00552486		PBRM1	PRAD	4	2	498	0.00401606
HNSC	KAT2B	NA		CESC	HDAC1	NA		PBRM1	READ	4	4	151	0.0264901
LAML	KAT2B	NA		SARC	HDAC1	0.004		PBRM1	SARC	5	5	239	0.0209205
READ	KAT2B	0.00724638		BRCA	HDAC1	0.00286533		PBRM1	SKCM	40	33	468	0.0705128
LGG	KAT2B	0.015625		THYM	HDAC1	NA		PBRM1	STAD	32	28	439	0.0637813
DLBC	KAT2B	NA		MESO	HDAC1	0.0120482		PBRM1	TGCT	1	1	151	0.00662252
KICH	KAT2B	NA		COAD	HDAC1	0.00506329		PBRM1	THYM	3	2	123	0.0162602
UCS	KAT2B	NA		STAD	HDAC1	0.007109		PBRM1	UCEC	65	65	531	0.122411
ACC	KAT2B	NA		SKCM	HDAC1	0.00215983		PBRM1	UCS	2	2	57	0.0350877
PCPG	KAT2B	0.00609756		KIRC	HDAC1	NA		SIRT2	BLCA	5	4	411	0.00973236
UVM	KAT2B	NA		THCA	HDAC1	NA		SIRT2	BRCA	8	5	1026	0.00487329
GBM	KAT7	NA		HNSC	HDAC1	NA		SIRT2	CESC	3	3	291	0.0103093
OV	KAT7	0.0390625		LAML	HDAC1	NA		SIRT2	COAD	5	3	408	0.00735294
LUAD	KAT7	0.0302419		READ	HDAC1	NA		SIRT2	ESCA	2	1	185	0.00540541
LUSC	KAT7	0.0193548		LGG	HDAC1	0.00585938		SIRT2	GBM	2	2	403	0.00496278
PRAD	KAT7	0.0246407		DLBC	HDAC1	0.0212766		SIRT2	HNSC	4	2	509	0.00392927
UCEC	KAT7	0.01417		KICH	HDAC1	NA		SIRT2	LAML	1	1	140	0.00714286
BLCA	KAT7	0.0270936		UCS	HDAC1	NA		SIRT2	LIHC	2	2	365	0.00547945
TGCT	KAT7	NA		ACC	HDAC1	NA		SIRT2	LUAD	7	5	569	0.00878735
ESCA	KAT7	0.0306748		PCPG	HDAC1	0.0365854		SIRT2	LUSC	11	10	485	0.0206186
PAAD	KAT7	0.0228571		UVM	HDAC1	0.0125		SIRT2	OV	2	1	412	0.00242718
KIRP	KAT7	0.0408922		GBM	BRDT	NA		SIRT2	PRAD	2	2	498	0.00401606
LIHC	KAT7	0.0248619		OV	BRDT	0.00390625		SIRT2	READ	2	1	151	0.00662252
CESC	KAT7	0.0101351		LUAD	BRDT	0.00403226		SIRT2	SARC	3	2	239	0.0083682
SARC	KAT7	0.024		LUSC	BRDT	NA		SIRT2	SKCM	21	15	468	0.0320513
BRCA	KAT7	0.0735435		PRAD	BRDT	0.0184805		SIRT2	STAD	4	4	439	0.00911162
THYM	KAT7	0.00813008		UCEC	BRDT	NA		SIRT2	UCEC	23	16	531	0.0301318
MESO	KAT7	0.060241		BLCA	BRDT	0.00246305		SIRT2	UCS	1	1	57	0.0175439
COAD	KAT7	0.00506329		TGCT	BRDT	NA		SMARCA2	ACC	2	2	92	0.0217391
STAD	KAT7	0.0236967		ESCA	BRDT	0.00613497		SMARCA2	BLCA	30	28	411	0.0681265
SKCM	KAT7	0.0259179		PAAD	BRDT	0.00571429		SMARCA2	BRCA	17	14	1026	0.0136452
CHOL	KAT7	NA		KIRP	BRDT	NA		SMARCA2	CESC	12	11	291	0.0378007
KIRC	KAT7	0.0060423		LIHC	BRDT	0.00552486		SMARCA2	COAD	27	23	408	0.0563725
THCA	KAT7	0.00843882		CESC	BRDT	NA		SMARCA2	DLBC	2	1	37	0.027027
HNSC	KAT7	0.004		SARC	BRDT	0.008		SMARCA2	ESCA	4	4	185	0.0216216
LAML	KAT7	NA		BRCA	BRDT	0.00095511		SMARCA2	GBM	7	7	403	0.0173697
READ	KAT7	0.00724638		THYM	BRDT	NA		SMARCA2	HNSC	14	13	509	0.0255403
LGG	KAT7	0.015625		MESO	BRDT	NA		SMARCA2	KIRC	4	4	370	0.0108108
DLBC	KAT7	NA		COAD	BRDT	NA		SMARCA2	KIRP	4	3	282	0.0106383
KICH	KAT7	NA		STAD	BRDT	NA		SMARCA2	LAML	2	2	140	0.0142857
UCS	KAT7	0.0178571		SKCM	BRDT	NA		SMARCA2	LGG	1	1	526	0.00190114
ACC	KAT7	0.012987		KIRC	BRDT	0.0060423		SMARCA2	LIHC	8	7	365	0.0191781
PCPG	KAT7	0.0182927		THCA	BRDT	NA		SMARCA2	LUAD	26	22	569	0.0386643
UVM	KAT7	NA		HNSC	BRDT	0.002		SMARCA2	LUSC	16	12	485	0.0247423
GBM	KAT6B	NA		LAML	BRDT	NA		SMARCA2	OV	10	8	412	0.0194175
OV	KAT6B	0.0585938		READ	BRDT	NA		SMARCA2	PAAD	1	1	178	0.00561798
LUAD	KAT6B	0.00403226		LGG	BRDT	0.00585938		SMARCA2	PRAD	3	3	498	0.0060241
LUSC	KAT6B	0.0150538		DLBC	BRDT	NA		SMARCA2	READ	4	4	151	0.0264901
PRAD	KAT6B	0.00616016		KICH	BRDT	NA		SMARCA2	SARC	4	3	239	0.0125523
UCEC	KAT6B	0.0445344		UCS	BRDT	NA		SMARCA2	SKCM	52	37	468	0.0790598
BLCA	KAT6B	0.0197044		ACC	BRDT	NA		SMARCA2	STAD	35	28	439	0.0637813
TGCT	KAT6B	NA		PCPG	BRDT	0.0487805		SMARCA2	TGCT	1	1	151	0.00662252
ESCA	KAT6B	0.0184049		UVM	BRDT	0.0125		SMARCA2	UCEC	68	63	531	0.118644
PAAD	KAT6B	0.0171429		GBM	KAT8	NA		SMARCA2	UCS	1	1	57	0.0175439
KIRP	KAT6B	NA		OV	KAT8	0.00390625		SMARCA4	ACC	3	2	92	0.0217391
LIHC	KAT6B	0.00552486		LUAD	KAT8	NA		SMARCA4	BLCA	29	25	411	0.0608273
CESC	KAT6B	0.00675676		LUSC	KAT8	0.00215054		SMARCA4	BRCA	19	16	1026	0.0155945
SARC	KAT6B	NA		PRAD	KAT8	0.00410678		SMARCA4	CESC	17	10	291	0.0343643
BRCA	KAT6B	0.0219675		UCEC	KAT8	NA		SMARCA4	COAD	36	25	408	0.0612745
THYM	KAT6B	NA		BLCA	KAT8	NA		SMARCA4	DLBC	1	1	37	0.027027
MESO	KAT6B	NA		TGCT	KAT8	NA		SMARCA4	ESCA	14	13	185	0.0702703
COAD	KAT6B	0.0126582		ESCA	KAT8	NA		SMARCA4	GBM	10	8	403	0.0198511
STAD	KAT6B	0.049763		PAAD	KAT8	NA		SMARCA4	HNSC	25	23	509	0.0451866
SKCM	KAT6B	0.00215983		KIRP	KAT8	NA		SMARCA4	KIRC	12	11	370	0.0297297
CHOL	KAT6B	0.0555556		LIHC	KAT8	NA		SMARCA4	KIRP	14	12	282	0.0425532
KIRC	KAT6B	NA		CESC	KAT8	0.00337838		SMARCA4	LAML	1	1	140	0.00714286
THCA	KAT6B	NA		SARC	KAT8	NA		SMARCA4	LGG	26	25	526	0.0475285
HNSC	KAT6B	0.004		BRCA	KAT8	NA		SMARCA4	LIHC	11	11	365	0.030137
LAML	KAT6B	0.00847458		THYM	KAT8	NA		SMARCA4	LUAD	51	47	569	0.0826011
READ	KAT6B	0.00724638		MESO	KAT8	NA		SMARCA4	LUSC	26	21	485	0.043299
LGG	KAT6B	0.00195312		COAD	KAT8	NA		SMARCA4	MESO	1	1	82	0.0121951
DLBC	KAT6B	NA		STAD	KAT8	NA		SMARCA4	OV	7	4	412	0.00970874
KICH	KAT6B	NA		SKCM	KAT8	NA		SMARCA4	PAAD	2	2	178	0.011236
UCS	KAT6B	0.0714286		KIRC	KAT8	NA		SMARCA4	PRAD	2	2	498	0.00401606
ACC	KAT6B	NA		THCA	KAT8	NA		SMARCA4	READ	7	6	151	0.0397351
PCPG	KAT6B	NA		HNSC	KAT8	NA		SMARCA4	SARC	4	3	239	0.0125523
UVM	KAT6B	NA		LAML	KAT8	NA		SMARCA4	SKCM	58	47	468	0.100427
GBM	ATAD2B	NA		READ	KAT8	NA		SMARCA4	STAD	32	25	439	0.0569476
OV	ATAD2B	0.0585938		LGG	KAT8	NA		SMARCA4	THCA	5	3	500	0.006
LUAD	ATAD2B	0.00806452		DLBC	KAT8	NA		SMARCA4	THYM	2	2	123	0.0162602
LUSC	ATAD2B	0.0408602		KICH	KAT8	NA		SMARCA4	UCEC	74	55	531	0.103578
PRAD	ATAD2B	0.0102669		UCS	KAT8	NA		SMARCA4	UCS	2	2	57	0.0350877
UCEC	ATAD2B	0.034413		ACC	KAT8	NA		SMARCA4	UVM	1	1	80	0.0125
BLCA	ATAD2B	0.0394089		PCPG	KAT8	NA		TAF1	ACC	3	3	92	0.0326087
TGCT	ATAD2B	NA		UVM	KAT8	NA		TAF1	BLCA	14	10	411	0.0243309
ESCA	ATAD2B	0.0122699		GBM	BRD2	NA		TAF1	BRCA	28	25	1026	0.0243665
PAAD	ATAD2B	NA		OV	BRD2	0.00390625		TAF1	CESC	20	18	291	0.0618557
KIRP	ATAD2B	0.00743494		LUAD	BRD2	NA		TAF1	COAD	21	19	408	0.0465686
LIHC	ATAD2B	0.0276243		LUSC	BRD2	0.00430108		TAF1	ESCA	3	3	185	0.0162162
CESC	ATAD2B	0.0304054		PRAD	BRD2	0.00616016		TAF1	GBM	11	8	403	0.0198511
SARC	ATAD2B	0.008		UCEC	BRD2	NA		TAF1	HNSC	15	12	509	0.0235756
BRCA	ATAD2B	0.0095511		BLCA	BRD2	0.00492611		TAF1	KICH	1	1	66	0.0151515
THYM	ATAD2B	NA		TGCT	BRD2	NA		TAF1	KIRC	7	5	370	0.0135135
MESO	ATAD2B	NA		ESCA	BRD2	NA		TAF1	KIRP	9	7	282	0.0248227
COAD	ATAD2B	NA		PAAD	BRD2	NA		TAF1	LAML	2	2	140	0.0142857
STAD	ATAD2B	0.007109		KIRP	BRD2	0.00371747		TAF1	LGG	7	5	526	0.0095057
SKCM	ATAD2B	0.00215983		LIHC	BRD2	NA		TAF1	LIHC	10	7	365	0.0191781
CHOL	ATAD2B	0.0277778		CESC	BRD2	NA		TAF1	LUAD	29	26	569	0.0456942
KIRC	ATAD2B	NA		SARC	BRD2	0.004		TAF1	LUSC	27	23	485	0.0474227
THCA	ATAD2B	NA		BRCA	BRD2	0.00095511		TAF1	OV	13	10	412	0.0242718
HNSC	ATAD2B	0.01		THYM	BRD2	0.00813008		TAF1	PAAD	3	3	178	0.0168539
LAML	ATAD2B	NA		MESO	BRD2	NA		TAF1	PCPG	1	1	184	0.00543478
READ	ATAD2B	NA		COAD	BRD2	0.0101266		TAF1	PRAD	3	2	498	0.00401606
LGG	ATAD2B	0.00195312		STAD	BRD2	0.00947867		TAF1	READ	5	4	151	0.0264901
DLBC	ATAD2B	0.0212766		SKCM	BRD2	NA		TAF1	SARC	3	3	239	0.0125523
KICH	ATAD2B	NA		KIRC	BRD2	NA		TAF1	SKCM	58	45	468	0.0961538
UCS	ATAD2B	0.0714286		THCA	BRD2	NA		TAF1	STAD	22	20	439	0.0455581
ACC	ATAD2B	NA		HNSC	BRD2	0.008		TAF1	TGCT	2	2	151	0.013245
PCPG	ATAD2B	0.0121951		LAML	BRD2	NA		TAF1	THCA	2	2	500	0.004
UVM	ATAD2B	0.0125		READ	BRD2	NA		TAF1	THYM	1	1	123	0.00813008
GBM	KAT6A	NA		LGG	BRD2	NA		TAF1	UCEC	111	107	531	0.201507
OV	KAT6A	0.0390625		DLBC	BRD2	0.0851064		TAF1	UCS	3	2	57	0.0350877
LUAD	KAT6A	0.0483871		KICH	BRD2	NA		YEATS4	BLCA	3	2	411	0.00486618
LUSC	KAT6A	0.0946237		UCS	BRD2	NA		YEATS4	BRCA	2	1	1026	0.000974659
PRAD	KAT6A	0.036961		ACC	BRD2	NA		YEATS4	CESC	1	1	291	0.00343643
UCEC	KAT6A	0.0668016		PCPG	BRD2	NA		YEATS4	COAD	1	1	408	0.00245098
BLCA	KAT6A	0.0763547		UVM	BRD2	NA		YEATS4	GBM	3	2	403	0.00496278
TGCT	KAT6A	0.00645161		GBM	BRD4	NA		YEATS4	KIRC	3	2	370	0.00540541
ESCA	KAT6A	0.0797546		OV	BRD4	NA		YEATS4	KIRP	1	1	282	0.0035461
PAAD	KAT6A	0.0285714		LUAD	BRD4	0.00806452		YEATS4	LAML	2	2	140	0.0142857
KIRP	KAT6A	NA		LUSC	BRD4	0.00430108		YEATS4	LIHC	2	2	365	0.00547945
LIHC	KAT6A	0.0248619		PRAD	BRD4	0.00410678		YEATS4	LUAD	2	2	569	0.00351494
CESC	KAT6A	0.0236486		UCEC	BRD4	NA		YEATS4	READ	3	2	151	0.013245
SARC	KAT6A	0.024		BLCA	BRD4	0.00246305		YEATS4	SARC	1	1	239	0.0041841
BRCA	KAT6A	0.0878701		TGCT	BRD4	NA		YEATS4	SKCM	12	9	468	0.0192308
THYM	KAT6A	0.00813008		ESCA	BRD4	NA		YEATS4	STAD	7	5	439	0.0113895
MESO	KAT6A	NA		PAAD	BRD4	NA		YEATS4	THCA	1	1	500	0.002
COAD	KAT6A	0.0531646		KIRP	BRD4	0.0111524		YEATS4	UCEC	15	13	531	0.0244821
STAD	KAT6A	0.014218		LIHC	BRD4	NA
SKCM	KAT6A	0.0107991		CESC	BRD4	0.0101351
CHOL	KAT6A	NA		SARC	BRD4	NA
KIRC	KAT6A	0.0060423		BRCA	BRD4	NA
THCA	KAT6A	NA		THYM	BRD4	NA
HNSC	KAT6A	0.036		MESO	BRD4	NA
LAML	KAT6A	0.00847458		COAD	BRD4	0.00759494
READ	KAT6A	0.0507246		STAD	BRD4	0.007109
LGG	KAT6A	0.00585938		SKCM	BRD4	NA
DLBC	KAT6A	0.0212766		KIRC	BRD4	NA
KICH	KAT6A	NA		THCA	BRD4	0.00421941
UCS	KAT6A	0.232143		HNSC	BRD4	0.002
ACC	KAT6A	NA		LAML	BRD4	NA
PCPG	KAT6A	0.00609756		READ	BRD4	NA
UVM	KAT6A	NA		LGG	BRD4	NA
GBM	BRDT	NA		DLBC	BRD4	0.0212766
OV	BRDT	0.0351562		KICH	BRD4	NA
LUAD	BRDT	0.0100806		UCS	BRD4	NA
LUSC	BRDT	0.00645161		ACC	BRD4	NA
PRAD	BRDT	0.00205339		PCPG	BRD4	NA
UCEC	BRDT	0.00404858		UVM	BRD4	NA
BLCA	BRDT	0.0147783		GBM	KAT2B	NA
TGCT	BRDT	NA		OV	KAT2B	NA
ESCA	BRDT	NA		LUAD	KAT2B	0.00403226
PAAD	BRDT	NA		LUSC	KAT2B	0.0107527
KIRP	BRDT	NA		PRAD	KAT2B	0.00616016
LIHC	BRDT	0.00276243		UCEC	KAT2B	0.00404858
CESC	BRDT	0.00675676		BLCA	KAT2B	0.00492611
SARC	BRDT	0.032		TGCT	KAT2B	NA
BRCA	BRDT	0.0143266		ESCA	KAT2B	NA
THYM	BRDT	NA		PAAD	KAT2B	NA
MESO	BRDT	0.0120482		KIRP	KAT2B	NA
COAD	BRDT	NA		LIHC	KAT2B	0.00276243
STAD	BRDT	NA		CESC	KAT2B	0.0101351
SKCM	BRDT	0.0107991		SARC	KAT2B	0.012
CHOL	BRDT	NA		BRCA	KAT2B	0.00095511
KIRC	BRDT	NA		THYM	KAT2B	0.00813008
THCA	BRDT	NA		MESO	KAT2B	NA
HNSC	BRDT	0.004		COAD	KAT2B	0.00506329
LAML	BRDT	0.0169492		STAD	KAT2B	0.007109
READ	BRDT	NA		SKCM	KAT2B	0.00431965
LGG	BRDT	0.0078125		KIRC	KAT2B	0.226586
DLBC	BRDT	NA		THCA	KAT2B	NA
KICH	BRDT	NA		HNSC	KAT2B	0.008
UCS	BRDT	NA		LAML	KAT2B	0.00847458
ACC	BRDT	0.012987		READ	KAT2B	0.00724638
PCPG	BRDT	NA		LGG	KAT2B	0.00390625
UVM	BRDT	NA		DLBC	KAT2B	NA
GBM	DPF3	NA		KICH	KAT2B	NA
OV	DPF3	0.00390625		UCS	KAT2B	NA
LUAD	DPF3	0.00806452		ACC	KAT2B	NA
LUSC	DPF3	0.0150538		PCPG	KAT2B	NA
PRAD	DPF3	0.00410678		UVM	KAT2B	NA
UCEC	DPF3	NA		GBM	BRD3	NA
BLCA	DPF3	0.00738916		OV	BRD3	NA
TGCT	DPF3	NA		LUAD	BRD3	0.00604839
ESCA	DPF3	0.00613497		LUSC	BRD3	0.00645161
PAAD	DPF3	0.00571429		PRAD	BRD3	0.00205339
KIRP	DPF3	NA		UCEC	BRD3	0.00404858
LIHC	DPF3	NA		BLCA	BRD3	0.0123153
CESC	DPF3	0.0168919		TGCT	BRD3	0.0193548
SARC	DPF3	0.012		ESCA	BRD3	NA
BRCA	DPF3	0.00477555		PAAD	BRD3	0.00571429
THYM	DPF3	NA		KIRP	BRD3	NA
MESO	DPF3	NA		LIHC	BRD3	0.0165746
COAD	DPF3	NA		CESC	BRD3	NA
STAD	DPF3	0.00236967		SARC	BRD3	0.012
SKCM	DPF3	NA		BRCA	BRD3	0.00668577
CHOL	DPF3	NA		THYM	BRD3	0.0162602
KIRC	DPF3	NA		MESO	BRD3	NA
THCA	DPF3	NA		COAD	BRD3	0.00253165
HNSC	DPF3	0.016		STAD	BRD3	0.00236967
LAML	DPF3	NA		SKCM	BRD3	0.00215983
READ	DPF3	NA		KIRC	BRD3	0.0120846
LGG	DPF3	NA		THCA	BRD3	0.00421941
DLBC	DPF3	0.0212766		HNSC	BRD3	0.002
KICH	DPF3	NA		LAML	BRD3	0.00847458
UCS	DPF3	NA		READ	BRD3	NA
ACC	DPF3	NA		LGG	BRD3	0.00195312
PCPG	DPF3	0.00609756		DLBC	BRD3	NA
UVM	DPF3	NA		KICH	BRD3	NA
GBM	HDAC8	NA		UCS	BRD3	NA
OV	HDAC8	0.0351562		ACC	BRD3	NA
LUAD	HDAC8	0.0100806		PCPG	BRD3	NA
LUSC	HDAC8	0.00215054		UVM	BRD3	NA
PRAD	HDAC8	0.00616016		GBM	HDAC8	NA
UCEC	HDAC8	0.0101215		OV	HDAC8	NA
BLCA	HDAC8	0.00738916		LUAD	HDAC8	0.00201613
TGCT	HDAC8	NA		LUSC	HDAC8	0.0150538
ESCA	HDAC8	0.0122699		PRAD	HDAC8	0.00821355
PAAD	HDAC8	0.00571429		UCEC	HDAC8	0.00202429
KIRP	HDAC8	NA		BLCA	HDAC8	0.00985222
LIHC	HDAC8	0.00552486		TGCT	HDAC8	0.00645161
CESC	HDAC8	0.00337838		ESCA	HDAC8	NA
SARC	HDAC8	0.028		PAAD	HDAC8	NA
BRCA	HDAC8	0.00286533		KIRP	HDAC8	NA
THYM	HDAC8	0.00813008		LIHC	HDAC8	0.00828729
MESO	HDAC8	NA		CESC	HDAC8	0.00675676
COAD	HDAC8	0.00506329		SARC	HDAC8	0.016
STAD	HDAC8	0.00473934		BRCA	HDAC8	0.00191022
SKCM	HDAC8	0.0107991		THYM	HDAC8	NA
CHOL	HDAC8	NA		MESO	HDAC8	NA
KIRC	HDAC8	NA		COAD	HDAC8	0.00253165
THCA	HDAC8	0.0021097		STAD	HDAC8	0.014218
HNSC	HDAC8	0.016		SKCM	HDAC8	NA
LAML	HDAC8	NA		KIRC	HDAC8	0.0060423
READ	HDAC8	NA		THCA	HDAC8	NA
LGG	HDAC8	0.0214844		HNSC	HDAC8	0.006
DLBC	HDAC8	NA		LAML	HDAC8	NA
KICH	HDAC8	NA		READ	HDAC8	NA
UCS	HDAC8	NA		LGG	HDAC8	0.00195312
ACC	HDAC8	NA		DLBC	HDAC8	0.0212766
PCPG	HDAC8	NA		KICH	HDAC8	0.0163934
UVM	HDAC8	NA		UCS	HDAC8	NA
GBM	HDAC4	NA		ACC	HDAC8	NA
OV	HDAC4	0.0390625		PCPG	HDAC8	NA
LUAD	HDAC4	0.0181452		UVM	HDAC8	NA
LUSC	HDAC4	0.00645161		GBM	TAF1	NA
PRAD	HDAC4	NA		OV	TAF1	NA
UCEC	HDAC4	0.00809717		LUAD	TAF1	0.00403226
BLCA	HDAC4	NA		LUSC	TAF1	0.0150538
TGCT	HDAC4	NA		PRAD	TAF1	0.0102669
ESCA	HDAC4	0.0122699		UCEC	TAF1	0.00202429
PAAD	HDAC4	0.0228571		BLCA	TAF1	0.00985222
KIRP	HDAC4	0.00371747		TGCT	TAF1	0.0129032
LIHC	HDAC4	0.00276243		ESCA	TAF1	0.00613497
CESC	HDAC4	0.00337838		PAAD	TAF1	NA
SARC	HDAC4	0.012		KIRP	TAF1	NA
BRCA	HDAC4	0.00191022		LIHC	TAF1	0.00552486
THYM	HDAC4	NA		CESC	TAF1	0.0135135
MESO	HDAC4	0.0120482		SARC	TAF1	0.016
COAD	HDAC4	NA		BRCA	TAF1	0.00286533
STAD	HDAC4	0.00236967		THYM	TAF1	NA
SKCM	HDAC4	NA		MESO	TAF1	NA
CHOL	HDAC4	0.0277778		COAD	TAF1	0.00253165
KIRC	HDAC4	0.0120846		STAD	TAF1	0.014218
THCA	HDAC4	NA		SKCM	TAF1	NA
HNSC	HDAC4	0.002		KIRC	TAF1	0.0060423
LAML	HDAC4	NA		THCA	TAF1	NA
READ	HDAC4	NA		HNSC	TAF1	0.006
LGG	HDAC4	0.00195312		LAML	TAF1	NA
DLBC	HDAC4	0.0212766		READ	TAF1	NA
KICH	HDAC4	NA		LGG	TAF1	NA
UCS	HDAC4	0.0357143		DLBC	TAF1	NA
ACC	HDAC4	0.012987		KICH	TAF1	0.0163934
PCPG	HDAC4	NA		UCS	TAF1	NA
UVM	HDAC4	NA		ACC	TAF1	NA
GBM	HDAC5	NA		PCPG	TAF1	NA
OV	HDAC5	0.0078125		UVM	TAF1	NA
LUAD	HDAC5	0.0201613		GBM	HDAC11	NA
LUSC	HDAC5	0.0193548		OV	HDAC11	NA
PRAD	HDAC5	0.00616016		LUAD	HDAC11	0.00201613
UCEC	HDAC5	0.0161943		LUSC	HDAC11	0.00645161
BLCA	HDAC5	0.0147783		PRAD	HDAC11	0.0102669
TGCT	HDAC5	NA		UCEC	HDAC11	0.00202429
ESCA	HDAC5	0.0490798		BLCA	HDAC11	0.00492611
PAAD	HDAC5	0.0228571		TGCT	HDAC11	NA
KIRP	HDAC5	0.0223048		ESCA	HDAC11	NA
LIHC	HDAC5	0.0248619		PAAD	HDAC11	NA
CESC	HDAC5	0.00337838		KIRP	HDAC11	NA
SARC	HDAC5	0.008		LIHC	HDAC11	NA
BRCA	HDAC5	0.0191022		CESC	HDAC11	0.0101351
THYM	HDAC5	0.0162602		SARC	HDAC11	0.012
MESO	HDAC5	0.0240964		BRCA	HDAC11	NA
COAD	HDAC5	0.00253165		THYM	HDAC11	0.00813008
STAD	HDAC5	0.021327		MESO	HDAC11	NA
SKCM	HDAC5	0.00647948		COAD	HDAC11	0.00253165
CHOL	HDAC5	NA		STAD	HDAC11	0.00236967
KIRC	HDAC5	0.00302115		SKCM	HDAC11	0.00215983
THCA	HDAC5	0.00632911		KIRC	HDAC11	0.223565
HNSC	HDAC5	0.004		THCA	HDAC11	NA
LAML	HDAC5	NA		HNSC	HDAC11	0.01
READ	HDAC5	0.00724638		LAML	HDAC11	NA
LGG	HDAC5	0.0078125		READ	HDAC11	0.00724638
DLBC	HDAC5	NA		LGG	HDAC11	0.00390625
KICH	HDAC5	NA		DLBC	HDAC11	NA
UCS	HDAC5	0.0357143		KICH	HDAC11	NA
ACC	HDAC5	NA		UCS	HDAC11	NA
PCPG	HDAC5	0.0243902		ACC	HDAC11	NA
UVM	HDAC5	NA		PCPG	HDAC11	NA
GBM	TAF1	NA		UVM	HDAC11	0.025
OV	TAF1	0.0195312		GBM	HAT1	NA
LUAD	TAF1	0.00806452		OV	HAT1	NA
LUSC	TAF1	0.00215054		LUAD	HAT1	NA
PRAD	TAF1	0.00616016		LUSC	HAT1	0.00215054
UCEC	TAF1	0.01417		PRAD	HAT1	0.0390144
BLCA	TAF1	0.00985222		UCEC	HAT1	NA
TGCT	TAF1	NA		BLCA	HAT1	0.00246305
ESCA	TAF1	0.0122699		TGCT	HAT1	0.00645161
PAAD	TAF1	0.00571429		ESCA	HAT1	NA
KIRP	TAF1	NA		PAAD	HAT1	0.0114286
LIHC	TAF1	0.00828729		KIRP	HAT1	NA
CESC	TAF1	0.00337838		LIHC	HAT1	0.00828729
SARC	TAF1	0.032		CESC	HAT1	0.00337838
BRCA	TAF1	0.00382044		SARC	HAT1	0.012
THYM	TAF1	NA		BRCA	HAT1	NA
MESO	TAF1	NA		THYM	HAT1	0.00813008
COAD	TAF1	0.00759494		MESO	HAT1	NA
STAD	TAF1	0.00236967		COAD	HAT1	NA
SKCM	TAF1	0.00647948		STAD	HAT1	0.00473934
CHOL	TAF1	NA		SKCM	HAT1	NA
KIRC	TAF1	NA		KIRC	HAT1	NA
THCA	TAF1	0.0021097		THCA	HAT1	NA
HNSC	TAF1	0.018		HNSC	HAT1	NA
LAML	TAF1	0.00847458		LAML	HAT1	NA
READ	TAF1	NA		READ	HAT1	NA
LGG	TAF1	0.0175781		LGG	HAT1	0.00195312
DLBC	TAF1	NA		DLBC	HAT1	0.0212766
KICH	TAF1	NA		KICH	HAT1	NA
UCS	TAF1	0.0178571		UCS	HAT1	NA
ACC	TAF1	NA		ACC	HAT1	NA
PCPG	TAF1	NA		PCPG	HAT1	NA
UVM	TAF1	NA		UVM	HAT1	NA
GBM	EP300	NA		GBM	ATAD2B	NA
OV	EP300	0.00390625		OV	ATAD2B	NA
LUAD	EP300	0.00201613		LUAD	ATAD2B	NA
LUSC	EP300	0.0150538		LUSC	ATAD2B	0.00215054
PRAD	EP300	0.00205339		PRAD	ATAD2B	0.00205339
UCEC	EP300	0.0101215		UCEC	ATAD2B	NA
BLCA	EP300	NA		BLCA	ATAD2B	0.00246305
TGCT	EP300	NA		TGCT	ATAD2B	NA
ESCA	EP300	NA		ESCA	ATAD2B	NA
PAAD	EP300	0.0228571		PAAD	ATAD2B	NA
KIRP	EP300	NA		KIRP	ATAD2B	0.00371747
LIHC	EP300	0.0110497		LIHC	ATAD2B	0.00552486
CESC	EP300	0.00675676		CESC	ATAD2B	NA
SARC	EP300	0.016		SARC	ATAD2B	0.004
BRCA	EP300	0.00764088		BRCA	ATAD2B	0.00286533
THYM	EP300	NA		THYM	ATAD2B	NA
MESO	EP300	NA		MESO	ATAD2B	NA
COAD	EP300	NA		COAD	ATAD2B	NA
STAD	EP300	NA		STAD	ATAD2B	0.00473934
SKCM	EP300	0.062635		SKCM	ATAD2B	NA
CHOL	EP300	0.0277778		KIRC	ATAD2B	NA
KIRC	EP300	NA		THCA	ATAD2B	0.0021097
THCA	EP300	NA		HNSC	ATAD2B	0.002
HNSC	EP300	0.006		LAML	ATAD2B	NA
LAML	EP300	NA		READ	ATAD2B	NA
READ	EP300	NA		LGG	ATAD2B	NA
LGG	EP300	0.0078125		DLBC	ATAD2B	NA
DLBC	EP300	NA		KICH	ATAD2B	NA
KICH	EP300	NA		UCS	ATAD2B	0.0178571
UCS	EP300	NA		ACC	ATAD2B	NA
ACC	EP300	NA		PCPG	ATAD2B	NA
PCPG	EP300	NA		UVM	ATAD2B	NA
UVM	EP300	NA		GBM	YEATS4	NA
GBM	KAT8	NA		OV	YEATS4	NA
OV	KAT8	0.00390625		LUAD	YEATS4	NA
LUAD	KAT8	0.0201613		LUSC	YEATS4	NA
LUSC	KAT8	0.00860215		PRAD	YEATS4	NA
PRAD	KAT8	0.0164271		UCEC	YEATS4	0.00202429
UCEC	KAT8	0.0182186		BLCA	YEATS4	NA
BLCA	KAT8	0.00985222		TGCT	YEATS4	NA
TGCT	KAT8	NA		ESCA	YEATS4	NA
ESCA	KAT8	0.0122699		PAAD	YEATS4	NA
PAAD	KAT8	0.00571429		KIRP	YEATS4	NA
KIRP	KAT8	0.00743494		LIHC	YEATS4	NA
LIHC	KAT8	0.00552486		CESC	YEATS4	NA
CESC	KAT8	0.00337838		SARC	YEATS4	NA
SARC	KAT8	0.012		BRCA	YEATS4	NA
BRCA	KAT8	0.0620821		THYM	YEATS4	NA
THYM	KAT8	NA		MESO	YEATS4	NA
MESO	KAT8	0.0240964		COAD	YEATS4	NA
COAD	KAT8	0.0177215		STAD	YEATS4	NA
STAD	KAT8	0.0165877		SKCM	YEATS4	0.00215983
SKCM	KAT8	0.00215983		KIRC	YEATS4	NA
CHOL	KAT8	NA		THCA	YEATS4	NA
KIRC	KAT8	0.0060423		HNSC	YEATS4	NA
THCA	KAT8	NA		LAML	YEATS4	NA
HNSC	KAT8	0.002		READ	YEATS4	NA
LAML	KAT8	NA		LGG	YEATS4	0.0078125
READ	KAT8	NA		DLBC	YEATS4	NA
LGG	KAT8	0.0078125		KICH	YEATS4	NA
DLBC	KAT8	NA		UCS	YEATS4	NA
KICH	KAT8	NA		ACC	YEATS4	NA
UCS	KAT8	0.0535714		PCPG	YEATS4	NA
ACC	KAT8	NA		UVM	YEATS4	NA
PCPG	KAT8	NA		GBM	BPTF	NA
UVM	KAT8	0.0125		OV	BPTF	NA
GBM	KAT2A	NA		LUAD	BPTF	NA
OV	KAT2A	NA		LUSC	BPTF	NA
LUAD	KAT2A	0.016129		PRAD	BPTF	NA
LUSC	KAT2A	0.0107527		UCEC	BPTF	NA
PRAD	KAT2A	0.00205339		BLCA	BPTF	NA
UCEC	KAT2A	0.00607287		TGCT	BPTF	NA
BLCA	KAT2A	0.0147783		ESCA	BPTF	NA
TGCT	KAT2A	NA		PAAD	BPTF	NA
ESCA	KAT2A	0.0674847		KIRP	BPTF	NA
PAAD	KAT2A	0.0171429		LIHC	BPTF	NA
KIRP	KAT2A	0.0223048		CESC	BPTF	NA
LIHC	KAT2A	0.0248619		SARC	BPTF	NA
CESC	KAT2A	0.00675676		BRCA	BPTF	NA
SARC	KAT2A	NA		THYM	BPTF	NA
BRCA	KAT2A	0.0210124		MESO	BPTF	NA
THYM	KAT2A	0.00813008		COAD	BPTF	NA
MESO	KAT2A	0.0240964		STAD	BPTF	NA
COAD	KAT2A	0.00506329		SKCM	BPTF	NA
STAD	KAT2A	0.0260664		KIRC	BPTF	NA
SKCM	KAT2A	0.00431965		THCA	BPTF	NA
CHOL	KAT2A	NA		HNSC	BPTF	NA
KIRC	KAT2A	0.00302115		LAML	BPTF	NA
THCA	KAT2A	0.00632911		READ	BPTF	NA
HNSC	KAT2A	0.006		LGG	BPTF	NA
LAML	KAT2A	NA		DLBC	BPTF	NA
READ	KAT2A	0.00724638		KICH	BPTF	NA
LGG	KAT2A	0.0078125		UCS	BPTF	NA
DLBC	KAT2A	NA		ACC	BPTF	0.012987
KICH	KAT2A	NA		PCPG	BPTF	NA
UCS	KAT2A	NA		UVM	BPTF	0.0125
ACC	KAT2A	NA
PCPG	KAT2A	0.0304878
UVM	KAT2A	NA
GBM	HDAC10	NA
OV	HDAC10	NA
LUAD	HDAC10	0.00604839
LUSC	HDAC10	0.0107527
PRAD	HDAC10	0.00616016
UCEC	HDAC10	0.00404858
BLCA	HDAC10	NA
TGCT	HDAC10	NA
ESCA	HDAC10	0.00613497
PAAD	HDAC10	0.00571429
KIRP	HDAC10	NA
LIHC	HDAC10	0.0110497
CESC	HDAC10	0.00675676
SARC	HDAC10	0.008
BRCA	HDAC10	0.00859599
THYM	HDAC10	NA
MESO	HDAC10	NA
COAD	HDAC10	NA
STAD	HDAC10	NA
SKCM	HDAC10	0.0259179
CHOL	HDAC10	NA
KIRC	HDAC10	0.00302115
THCA	HDAC10	NA
HNSC	HDAC10	0.004
LAML	HDAC10	NA
READ	HDAC10	NA
LGG	HDAC10	0.00585938
DLBC	HDAC10	NA
KICH	HDAC10	NA
UCS	HDAC10	NA
ACC	HDAC10	NA
PCPG	HDAC10	NA
UVM	HDAC10	NA
